1           **A host E3 ubiquitin ligase regulates *Salmonella* virulence by**  
2           **targeting an SPI-2 effector involved in SIF biogenesis**

3

4   Kun Meng<sup>1#</sup>, Jin Yang<sup>1#</sup>, Juan Xue<sup>1</sup>, Jun Lv<sup>1</sup>, Ping Zhu<sup>1</sup>, Liuliu Shi<sup>4</sup>, Shan Li<sup>1,2,3\*</sup>

5

6   <sup>1</sup>Institute of Infection and Immunity, Taihe Hospital, Hubei University of Medicine,  
7   Shiyan, Hubei, China;

8   <sup>2</sup>College of Life Science and Technology, Huazhong Agricultural University, Wuhan,  
9   Hubei, China;

10   <sup>3</sup>College of Biomedicine and Health, Huazhong Agricultural University, Wuhan,  
11   Hubei, China;

12   <sup>4</sup>School of Basic Medical Science, Hubei University of Medicine, Shiyan, Hubei,  
13   China.\*Corresponding author: Shan Li

14   <sup>#</sup>These authors contributed equally to this work.

15   **Email addresses of all the authors:**

16   Kun Meng: [15896536298@163.com](mailto:15896536298@163.com),

17   Jin Yang: [991529481@qq.com](mailto:991529481@qq.com),

18   Juan Xue: [xuejuanjuan0505@163.com](mailto:xuejuanjuan0505@163.com),

19   Jun Lv: [lvjunfisher@126.com](mailto:lvjunfisher@126.com),

20   Ping Zhu: [thzhuping01@163.com](mailto:thzhuping01@163.com),

21   Liuliu Shi: [shi-liuliu@163.com](mailto:shi-liuliu@163.com),

22   Shan Li: [lishan@mail.hzau.edu.cn](mailto:lishan@mail.hzau.edu.cn), telephone: +086-18910551673.

23   **Keywords:** E3 ligase, *Salmonella*, T3SS SPI-2 effector; SIF biogenesis.

24

## 25 **Abstract**

26 *Salmonella* Typhimurium creates an intracellular niche for its replication by  
27 utilizing a large cohort of effectors, including several that function to interfere with  
28 host ubiquitin signaling. Although the mechanism of action of many such effectors  
29 has been elucidated, how the interplay between the host ubiquitin network and  
30 bacterial virulence factors dictates the outcome of infection largely remains undefined.  
31 Here we found that the SPI-2 effector SseK3 inhibits SNARE pairing to promote the  
32 formation of *Salmonella*-induced filament by Arg-GlcNAcylation of SNARE proteins,  
33 including SNAP25, VAMP8, and Syntaxin. Further study reveals that host cells  
34 counteract the activity of SseK3 by inducing the expression of the ubiquitin E3 ligase  
35 TRIM32, which catalyzes K48-linked ubiquitination on SseK3 and targets its  
36 membrane-associated portion for degradation. Hence, TRIM32 antagonizes SNAP25  
37 Arg-GlcNAcylation induced by SseK3 to restrict SIF biogenesis and *Salmonella*  
38 replication. Our study reveals a mechanism by which host cells inhibit bacterial  
39 replication by eliminating specific virulence factor.

## 40 **Introduction**

41 *Salmonella enterica serovar* Typhimurium (*S. Typhimurium*) is a facultative  
42 intracellular pathogen capable of infecting multiple hosts to cause salmonellosis  
43 (Acheson and Hohmann, 2001). *S. Typhimurium* encodes two type III secretion  
44 systems (T3SSs), SPI-1 and SPI-2 that inject a large cohort of effector proteins into  
45 host cells(Dos Santos et al., 2020). Whereas the function of SPI-1 primarily is to  
46 promote invasion of non-phagocytic intestinal epithelial cells to establish a nascent  
47 phagosome, effectors translocated by SPI-2 function to remodel the phagosome into a  
48 niche permissive for bacteria replication called the *Salmonella*-containing vacuole  
49 (SCV)(Lou et al., 2019). A number of SPI-2 effectors are dedicated to subverting the  
50 endolysosomal system, including the formation of a complex and highly dynamic  
51 structure termed *Salmonella*-induced filaments (SIFs)(Jennings et al., 2017; Knuff  
52 and Finlay, 2017). Although many pathogens have the ability to create  
53 bacteria-containing vacuoles (BCVs) to support their intracellular replication, the  
54 formation of the SIF network is unique to *S. Typhimurium* (Santos and Enninga,  
55 2016). The ability of this pathogen to form SIF strongly correlates with its ability to  
56 cause diseases in animal infection models (Stein et al., 1996). It had been  
57 hypothesized that SIF structures facilitate the bacterium to gain access to nutrients  
58 and/or to evade host immunity (Liss et al., 2017; Noster et al., 2019). Thus,  
59 understanding the mechanisms of SIF biogenesis and maintenance will not only lead  
60 to a better appreciation of the *S. Typhimurium* pathogenesis and host cell biology but  
61 also provide clues for its disruption as novel interference strategies against  
62 salmonellosis.

63 Ubiquitin signaling plays an essential role in immunity by regulating various  
64 cellular processes, particularly protein turnover and vesicle trafficking(Dikic, 2017).  
65 Consistent with the existence of multiple mechanisms designed to sense and eliminate  
66 invading *S. Typhimurium*, the bacterium has evolved several virulence factors to  
67 counteract such surveillance by directly interfering with ubiquitin signaling. At least  
68 four *Salmonella* effectors have been shown to function as E3 ubiquitin ligases to  
69 modulate host immunity(Herhaus and Dikic, 2018). Among them, SopA is a  
70 HECT-like E3 ligase (Zhang et al., 2006) that modifies and targets TRIM56 and  
71 TRIM65, two host E3 ligases for degradation(Fiskin et al., 2017; Kamanova et al.,  
72 2016). The two IpaH-type E3 enzymes SspH1 and SspH2 target protein kinase 1 and  
73 NO1, respectively (Bhavsar et al., 2013; Haraga and Miller, 2006; Keszei et al., 2014).  
74 SlrP promotes host cell death by targeting thioredoxin and the Hsp40/DnaJ chaperone  
75 family associated with the endoplasmic reticulum (Bernal-Bayard et al., 2010;  
76 Bernal-Bayard and Ramos-Morales, 2009). In addition, the two deubiquitinases,  
77 AvrA and SseL have been found to regulate host immunity, particularly the NF- $\kappa$ B  
78 pathway(Hermanns and Hofmann, 2019; Mesquita et al., 2013; Ye et al., 2007). The  
79 fate of *S. Typhimurium* that escape the phagosome to reach the cytosol differs greatly  
80 from those residing in the membrane-bound vacuoles, these bacteria are first  
81 ubiquitinated by the E3 ligase RNF213, which strikingly directly recognizes and  
82 modifies the lipid A moiety of bacterial lipopolysaccharide (LPS)(Otten et al., 2021).  
83 Several other E3 ligases coordinate to build the ubiquitin coat on the bacterial surface  
84 to initiate xenophagy(Herhaus and Dikic, 2018), a process that was recently found to  
85 be inhibited by the effector SopF that ADP-ribosylates the ATP6V0C subunit of the  
86 v-ATPase complex (Xu et al., 2019).

87 Another cohort of *S. Typhimurium* effectors contribute to the development of the  
88 SCV by modulating vesicle trafficking (Galán, 2021). Although the cellular function  
89 of these effectors has been extensively studied (Tuli and Sharma, 2019), how the host  
90 cell counteracts their activity largely remains elusive. In the present study, we  
91 identified the host E3 ligase TRIM32 as a regulator for the activity of the SPI-2  
92 effector SseK3. We found that SseK3 catalyzes Arg-GlcNAcylation on SNAP25 and  
93 restricts SIF biogenesis mediated by the SseK3-SNARE axis and that infection by *S.*  
94 *Typhimurium* induces the expression of TRIM32, which antagonizes the activity of  
95 SseK3 by ubiquitination-mediated degradation.

## 96 **Results**

### 97 **SseK3 promotes SIF formation during *S. Typhimurium* infection**

98 Effectors translocated by the SPI-2 are required for the formation of SIFs (Knuff  
99 and Finlay, 2017). Among these, the three SseK proteins, SseK1, SseK2 and SseK3,  
100 are arginine GlcNAc transferases that are important for *S. Typhimurium*  
101 virulence (Meng et al., 2020). To test whether any of these effectors is involved in SIF  
102 biogenesis or maintenance, we examined the phenotypes by infecting a cell line  
103 derived from HeLa that expresses GFP-VAMP8 with several relevant *S.*  
104 *Typhimurium* strains, including the wild-type,  $\Delta sseK1/2/3$ , and  $\Delta ssaV$  which is  
105 defective in the SPI-2. Samples were assessed for the integrity of SCV membrane and  
106 SIF formation by confocal microscopy. At 2 h post-invasion, the frequency of  
107 VAMP8-coated SCVs for strain  $\Delta sseK1/2/3$  was similar to that of the wild-type and  
108 the  $\Delta ssaV$  mutant, with rates at  $81 \pm 2\%$ ,  $83 \pm 6\%$ , and  $83.1 \pm 4\%$ , respectively (**Figure**  
109 **S1**). Thus, SseKs do not contribute to the formation of nascent SCVs, which is  
110 consistent with the observation that Arg-GlcNAcylation induced by members of SseK

111 family does not occur until after 6 h post-infection(Meng et al., 2020). At 10 h  
112 post-invasion, we observed a significant decrease in the frequency of SIFs in cells  
113 infected with the  $\Delta sseK1/2/3$  strain when compared to those infected with wild-type *S.*  
114 *Typhimurium*. Furthermore, expression of SseK3, but not its enzymatically inactive  
115 mutant SseK3<sub>D226A/D228A</sub> restored the development of SIF to wild-type levels (**Figures**  
116 **1A and 1B**). These results indicate that SseK3 plays a role in promoting SIF  
117 formation during *S. Typhimurium* infection.

### 118 **SseK3 attacks SNARE proteins by Arg-GlcNAcylation**

119 We next investigated the mechanism underlying SseK3-induced SIF  
120 development. Our previous studies have shown that SseK3 catalyzes  
121 Arg-GlcNAcylation on death domain-containing receptor proteins and members of  
122 the Rab small GTPases(Meng et al., 2020; Pan et al., 2020). Yet, despite extensive  
123 efforts, we did not detect SseK3-induced modification of most of the Rabs involved in  
124 SIF formation, including Rab11, Rab9, and Rab7 in cells infected with *S.*  
125 *Typhimurium* (Meng et al., 2020). We thus attempted to identify SseK3 targets  
126 involving in SIF biogenesis by Arg-GlcNAc (Pan et al., 2014) followed by mass  
127 spectrometry analysis (**Figure 1C**). KEGG analysis of the putative SseK3 modified  
128 proteins revealed five significantly enriched pathways. Among them, nineteen  
129 proteins are involved in SNARE interactions in the vesicular transport pathway,  
130 including SNAP23, SNAP25, VAMP8, Vti1b, Syntaxin7, Syntaxin8, and Sec22b  
131 (**Figure 1D**, red dots). Further comparative analyses between SseK3 samples and  
132 controls led to the identification of several GTPase proteins that had been previously  
133 identified (green dots, e.g., Rab1 and Rab8), demonstrating the effectiveness of this  
134 strategy (**Figure 1D**). Complementation experiments with SseK1, SseK2 or SseK3  
135 showed that SseK3 was the sole enzyme responsible for modifying SNARE proteins

136 during infection (**Figure 1E**). Further experiments established that several SNARE  
137 proteins, including VAMP8, Syntaxin7, Syntaxin8, Vti1b, Sec22b, SNAP23, and  
138 SNAP25 are modified by SseK3 in cells infected with *S. Typhimurium* (**Figure 1F**).  
139 Among these, SNAP25 was most robustly modified by SseK3, suggesting that this  
140 protein is its preferred substrate (**Figures 1F and S2**). Taken together, these results  
141 indicate that SNARE proteins are new cellular targets of SseK3.

142 **SseK3 induces GlcNAcylation of SNAP25 on Arg30 and Arg31, two residues**  
143 **important for its interaction with VAMPs**

144 SNARE proteins share a common coiled-coil motif of 60–70 residues essential  
145 for membrane fusion (**Figure 2A**)(Harbury, 1998). By deletion mutagenesis, we  
146 found that the amino-terminal domain (1-90 aa, NTD) containing the coiled-coil motif  
147 of SNAP25 can be modified by SseK3 in cells infected with *S. Typhimurium* (**Figure**  
148 **2B**). To precisely map the modification site(s), we affinity-purified Flag-SNAP25  
149 from 293T cells co-transfected with either wild-type SseK3 or empty vector. By  
150 tandem MS (MS/MS) analysis, we detected one GluC-LysC peptide  
151  $^{28}\text{STRRMLQLVEE}^{38}$  with a mass shift of 406 Da only in samples from cells that  
152 co-expressed SseK3. The 406 Da increase in mass corresponds to the attachment of  
153 two GlcNAc moieties. Quantitation analysis revealed that approximately 75% of the  
154 peptides were modified (**Figure S3**). MS/MS analyses assigned the modification sites  
155 to Arg30 and Arg31 (**Figure 2C**), which were further verified by mutagenesis  
156 analysis. Modification signals were no longer detected in samples expressing the  
157 SNAP25 R30K/R31K mutant (**Figure 2D**). Importantly, both Arg30 and Arg31 are  
158 located within the coiled-coil domain of the *t*-SNARE, which is involved in SNAP25  
159 self-association and in interactions with its binding proteins (**Figure 2E**). To  
160 determine the impact of SseK3 on the binding of SNAP25 to its interacting partners,

161 we used mass spectrometry to analyze proteins pulled down by SNAP25 under  
162 conditions with and without SseK3, which revealed that VAMP8 was not present in  
163 the pulldown products from samples that expressed SseK3 (**Figure 2F**). This  
164 phenomenon can be recapitulated by experiments in which such binding was detected  
165 by immunoblotting of samples that expressed enzymatically inactive SseK3 (**Figure**  
166 **2G**).

167 **SseK3 limits the size of SNAP25-decorated infection-associated macropinosomes**  
168 **(IAMs) during late stages of infection**

169 SNAP25 is enriched on the fluid-filled infection-associated macropinosome  
170 (IAM) (Stévenin et al., 2021), and it plays a crucial role in homotypic fusion among  
171 IAMs and their heterotypic fusion with SCVs, an event that is required for the  
172 expansion of the bacterial phagosome shortly after phagocytosis (Stévenin et al.,  
173 2019). To explore the possibility that SseK3-induced GlcNAcylation may interfere  
174 with its ability to promote such fusion events and the expansion of the SCV, we  
175 measured the dimension of the SNAP25-containing vacuoles (SNAP25-CVs) that  
176 represent SCVs (with bacteria) and IAMs (without bacteria), respectively. Our results  
177 indicate that at 0.5 h and 2 h infection time, there was no significant difference  
178 between the diameter of SNAP25-CVs found in cells infected with wild-type bacteria  
179 and the  $\Delta sseK1/2/3$  mutant. Intriguingly, when the infection has proceeded for 6 h, the  
180 size of the SNAP25-CVs was significantly smaller in cells infected with the wild-type  
181 strain than that found in cells infected with the  $\Delta sseK1/2/3$  mutant (**Figure 3A**). Such  
182 difference disappeared when SseK3 was expressed in strain  $\Delta sseK1/2/3$  from a  
183 plasmid (**Figures 3B and 3C**). In agreement with these results, in cells transfected to  
184 express SseK3 prior to infection, the size of vacuoles formed by strain  $\Delta sseK1/2/3$   
185 became smaller (**Figures 3D and 3E**). Furthermore, signals of protein



186 Arg-GlcNAcylation induced by SseK3 in infected cells displayed clear co-localization  
187 with SNAP25 on bacterial vacuoles (**Figure 3D**). Thus, SseK3 limits the size of the  
188 SNAP25-containing IAM vacuole when the infection has proceeded for 6 h. Given  
189 the fact that SseK3 attenuates the interaction between SNAP25 and VAMPs (**Figure**  
190 **3F**), such alternations in the size of the vacuoles may be caused by the inhibition of  
191 fusion among IAMs and between IAMs and SCVs. Because SNAREs are essential for  
192 SIF formation (Kehl et al., 2020), it is likely that SseK3 interferes with SNARE  
193 pairing to impact SCV size and SIF formation at the late stage of infection (**Figure**  
194 **1A**).

#### 195 **Expression level of the host ubiquitin E3 ligase TRIM32 is induced upon *S.*** 196 ***Typhimurium* infection**

197 To determine the mechanism the host may employ to counteract the activity *S.*  
198 *Typhimurium* effectors, we re-analyzed the available transcriptomic data of host cells  
199 infected with strain SL1344 (Avraham et al., 2015). These efforts led to the  
200 identification of *trim32* that codes for an E3 ubiquitin ligase as one of the significantly  
201 induced genes in response to *S. Typhimurium* challenge (**Figure 4A**). Further  
202 analyses by quantitative real-time PCR (qRT-PCR) and immunoblotting confirmed  
203 that *trim32* is induced at both mRNA and protein levels upon bacterial challenge  
204 (**Figures 4B and 4C**). Moreover, overexpression of TRIM32 led to a significant  
205 decrease in the frequency of the intracellular SIF structures found in cells infected  
206 with *S. Typhimurium* (**Figures 4D and 4E**).

#### 207 **TRIM32 interacts with and ubiquitinates SseK3**

208 An earlier study has demonstrated interactions between TRIM32 and SseK3  
209 (Yang et al., 2015). Yet, SseK3 does not detectably modify TRIM32 by  
210 Arg-GlcNAcylation, and the physiological significance of this interaction is unknown.

211 TRIM32 consists of an amino-terminal RING domain, a type II B-box domain, a  
212 coiled-coil domain, and a carboxyl NHL domain. To determine which of these regions  
213 is important for its interaction with SseK3, we generated a series of TRIM32 deletion  
214 mutants and examined their ability to bind the effector. Results from these  
215 experiments indicate that the NHL domain is essential for SseK3 binding (**Figures 5A**  
216 **and 5B**).

217 TRIM32 is an E3 ubiquitin ligase that contains a RING finger domain. Therefore,  
218 we examined whether TRIM32 can catalyze ubiquitination on SseK3. Co-expression  
219 of TRIM32 with SseK3 and HA-ubiquitin led to ubiquitination of the effector. In  
220 contrast, no ubiquitination signal was detected in samples from cells transfected to  
221 express TRIM32 $\Delta$ RING lacking the RING domain or the enzymatically inactive  
222 mutant TRIM32(C39S) in which the active cysteine was mutated to alanine (Kehl et  
223 al., 2020) (**Figure 5C**). In agreement with these results, knocking-out *trim32*  
224 diminished SseK3 ubiquitination in a way that can be complemented with the  
225 wild-type gene but not the C39S mutant (**Figure 5D**). Furthermore, treatment of the  
226 cells with the proteasome inhibitor MG132 considerably enhanced SseK3  
227 ubiquitination (**Figure 5D**). SseK3 is a Golgi-located protein (Meng et al., 2020), and  
228 we found that TRIM32-mediated ubiquitination occurred at the membrane  
229 components of SseK3 (**Figure 5E**). Finally, in biochemical assays, inclusion of  
230 TRIM32 in reactions containing huBE1 (E1), UBCH5c (E2), Ub, and ATP led to  
231 robust SseK3 ubiquitination. Such modification did not occur in reactions receiving  
232 TRIM32 $\Delta$ RING (**Figure 5F**). Thus, TRIM32 ubiquitinates SseK3 by its NHL domain  
233 recognition.

234 **TRIM32 catalyzes K48-linked ubiquitination on SseK3 and targets its**  
235 **membrane-associated portion for degradation**

236           There are seven lysine residues (K6, K11, K27, K29, K33, K48, and K63) in the  
237 ubiquitin molecule, each dictates the formation of a specific type of polyubiquitin  
238 chain that determines the biological consequence of the modification (Walczak et al.,  
239 2012). To further understand the implications of TRIM32-induced ubiquitination on  
240 the activity of Ssek3, we evaluated the chain type of the ubiquitin polymers on SseK3  
241 using a series of lysine mutants of ubiquitin. Robust ubiquitination of SseK3 was  
242 observed in reactions receiving wild-type or K48-only ubiquitin (a mutant in which all  
243 Lys residues except for Lys48 have been replaced with Arg). Conversely, in reactions  
244 containing the K48R ubiquitin mutant, no ubiquitination was detected (**Figure 6A**).  
245 Polyubiquitination by K48 chain type typically results in protein degradation by the  
246 ubiquitin-proteasome system (UPS)(Clague and Urbé, 2010), we then investigated the  
247 stability of SseK3 *in cellulo*. Chase experiments with cycloheximide (CHX) showed  
248 that the levels of SseK3 associated with the membrane (M-SseK3) were markedly  
249 reduced in a manner that can be blocked by MG132 (**Figure 6B**). These results  
250 strongly suggest that SseK3 was degraded via the UPS after being ubiquitinated by  
251 TRIM32.

252           SseK3 has been shown to localize to the *cis*-Golgi apparatus(Meng et al., 2020).  
253 Importantly, RFP-TRIM32 also extensively targets to the Golgi apparatus when  
254 co-expressed with GFP-SseK3 in HeLa cells (**Figure 6C**). We therefore examined  
255 whether TRIM32 induces degradation of SseK3. Our results indicate TRIM32 indeed  
256 causes the reduction of SseK3 that is associated with membrane (**Figure 6D**).  
257 Consistently, knockout of *trim32* led to elevated SseK3 in the membrane fraction,  
258 which can be reversed by expressing TRIM32 but not the  $\Delta$ RING mutant. In contrast,  
259 the protein level of cytosol fraction of SseK3 (C-SseK3) was largely unaffected by  
260 TRIM32 (**Figure 6D**). Thus, TRIM32 induces K48-linked ubiquitination on SseK3,

261 which results in its degradation, particularly for protein that is associated with the  
262 membrane.

### 263 **TRIM32 antagonizes SNAP25 Arg-GlcNAcylation induced by SseK3 to restrict** 264 **SIF biogenesis and *Salmonella* replication**

265 The observation that TRIM32 ubiquitinates SseK3 and targets it for degradation  
266 suggests that this E3 ubiquitin ligase regulates the function of the effector. Indeed, we  
267 found that SseK3 injected into host cells by *S. Typhimurium* interacted with TRIM32  
268 (Figure 7A). As expected, the level of GlcNAcylation of SNAP25 decreased in samples  
269 expressing TRIM32 but not the mutant lacking the RING domain (Figure 7B). In line  
270 with these observations, overexpression of TRIM32 diminished the ability of SseK3  
271 to promote SIF formation (**Figures 7C and 7D**). Considering that both SseK3 protein  
272 and SIF structure are required for *Salmonella* intracellular survival within  
273 macrophages (Meng et al., 2020; Singh et al., 2018), we next determined the effects of  
274 TRIM32 on bacterial replication in macrophage cells. We synthesized three pairs of  
275 siRNA and found that the 2nd pair had the best down-regulation effect (**Figure 7E**).  
276 As expected, *trim32* knockdown efficiently facilitated bacterial replication of  
277 SseK3-expressing-*Salmonella*, but not *S. Typhimurium* lacking *sseKs* in RAW264.7  
278 macrophage cells (**Figure 7F**). Together, these results indicate that TRIM32 functions  
279 to restrict the activity of SseK3 by targeting it for proteasome degradation, thus  
280 lowering Arg-GlcNAcylation on SNAP25, which ultimately causes a reduction in SIF  
281 formation and bacterial virulence (**Figure 8**).

## 282 **Discussion**

283 The outcome of bacterial infection is dictated by intimate interactions between  
284 host factors and virulence factors (Tripathi - Giesgen et al., 2021). Several members

285 of the TRIM E3 ubiquitin ligase family have been found to be involved in regulating  
286 pathogen infection, including some that confer resistance to the virus by directly  
287 targeting viral proteins (Koepke et al., 2021; Lazzari and Meroni, 2016). TRIM56 and  
288 TRIM65 have been shown to be targeted by SopA, a HECT-like E3 ligase(Kamanova  
289 et al., 2016). Our discovery of TRIM32 as a host factor that functions to control *S.*  
290 Typhimurium virulence has expanded the role of these E3 ubiquitin ligases in defense  
291 against bacterial infection.

292       Importantly, an earlier study has shown that Trim32 plays a role in defending  
293 against *S. Typhimurium* infection because *trim32*<sup>-/-</sup> mice are more sensitive to  
294 inflammatory death caused by this bacterium (Yang et al., 2017). In this study, several  
295 lines of evidence show that TRIM32 is involved in the defense against *S.*  
296 Typhimurium by attacking the SPI-2 effector SseK3. First, the expression of TRIM32  
297 and SseK3 are synchronously upregulated. SseK3 belongs to an SPI-2 effector and  
298 begins to catalyze Arg-GlcNAcylation after 6 h post-infection(Meng et al., 2020).  
299 Both *trim32* mRNA and TRIM32 protein levels were significantly induced at this  
300 time (**Figure 4**). Second, TRIM32 interacts with SseK3 expressed by transfected or  
301 injected into host cells by *S. Typhimurium* via its carboxyl NHL repeats. Third,  
302 TRIM32 catalyzes K48-type polyubiquitin chains on SseK3 and targets its  
303 membrane-associated SseK3 for degradation. Fourth, overexpression of this E3 ligase  
304 led to less SIFs formation during *S. Typhimurium* infection, and *trim32* knockdown  
305 facilitated *Salmonella* replication within macrophage cells.

306       Our findings have also provided novel insights into the role of effector-induced  
307 Arg-GlcNAcylation in *S. Typhimurium* infection. Additional proteins potentially  
308 modified by members of the SseK have been identified in cells ectopically expressing  
309 the effectors or in cells infected with *S. Typhimurium* strains expressing specific

310 effectors (Meng et al., 2020; Newson et al., 2019). These results are consistent with  
311 observations made in an earlier RNAi screen which revealed that the canonical  
312 mammalian late endo-/lysosomal vesicle fusion machinery (SNARE and Rab  
313 GTPase) is involved in SIF biogenesis (Kehl et al., 2020). Our finding that multiple  
314 coiled-coil containing-domain proteins are Arg-GlcNAcylated in infected cells  
315 suggests that SseKs may act coordinately to target endomembrane components to  
316 facilitate *S. Typhimurium* replication. In particular, SseK3 appears to directly  
317 participate in this process by imposing Arg-GlcNAcylation on SNAP25, leading to  
318 inhibition of its pairing with VAMP8 and the restriction of the expansion of SCVs.  
319 This activity of SseK3 also causes a reduction in the size of macropinosomes, but the  
320 physiological consequence of such reduction is not clear. A recent screen using  
321 proximity labeling (BioID) found that SPI-2 effectors SseG, SopD2, PipB2, and SifA  
322 potentially interact with proteins in the SNARE complex (D'Costa et al., 2019).  
323 Interestingly, these effectors have been suggested to be involved in SIF  
324 formation (Knuff and Finlay, 2017). It is likely that multiple effectors, including  
325 SseK3 coordinate to regulate the dynamics of SNARE pairing to promote SIF  
326 biogenesis during *S. Typhimurium* infection. Future research aiming at dissecting the  
327 potential interplay among these effectors and how each is temporally and spatially  
328 regulated to ensure successful infection will yield more insights into their roles in the  
329 intracellular lifecycle of the pathogen.

330 A majority of proteins anchored in membrane-containing organelles have been  
331 reported to be degraded via the cytosolic proteasome system (Guo, 2022;  
332 Ramachandran et al., 2018). The spatial separation between substrate selection and  
333 degradation requires either membrane-anchored substrates extraction from the  
334 membrane or recruitment of 26S proteasomes to the membrane. A well-studied

335 example is the endoplasmic reticulum (ER)-associated protein degradation (ERAD)  
336 pathway. Ubiquitinated proteins on ER are extracted from the membrane by  
337 Cdc48p/p97 complex and conveyed to the proteasome(Hwang and Qi, 2018). Besides,  
338 FKBP38, residing in the ER and mitochondrial membranes, functions to anchor the  
339 26S proteasome to the organellar membrane(Nakagawa et al., 2007). Recently,  
340 proteasomes have been also reported to be constitutively associated with the Golgi  
341 membranes by PSMD6 and mediate the degradation of the Golgi protein  
342 GM130(Eisenberg-Lerner et al., 2020). SseK3 is a Golgi-located protein, and we here  
343 show that membrane counterparts of SseK3 are ubiquitinated and degraded in a  
344 proteasome-dependent manner. The mechanism is likely similar to GM130, and  
345 further investigations are needed.

346       Based on our results, we propose a model for the regulatory role of the  
347 TRIM32-SseK3-SNARE-SIF axis in *S. Typhimurium* infection. A few minutes after  
348 bacterial entry, the SCV increases in size through fusions with the macropinosomes.  
349 The *t*-SNARE protein SNAP25 localized on IAMs and v-SNARE VAMP8 are  
350 recruited to the SCV. The fusion between the SCV and IAMs allows the former to  
351 expand in size. As the infection has proceeded to late stages (>6h), SseK3 injected by  
352 the SPI-2 attacks SNAP25 by Arg-GlcNAcylation, leading to ablation of  
353 SNAP25-VAMP8 pairing and the SNARE fusion events, which may contribute to SIF  
354 formation. Meanwhile, infected cells sense the presence of *S. Typhimurium* and  
355 induce the expression of *trim32* by a yet unrecognized mechanism. Elevated TRIM32  
356 captures membrane-associated SseK3 for ubiquitination and subsequent proteasome  
357 degradation, which restricts SseK3-SNARE-mediated SIF biogenesis and inhibits the  
358 intracellular replication of *Salmonella* (**Figure 8**).

## 359 **Materials and Methods**

### 360 **Bacterial strains, cell culture and infection**

361 *S. Typhimurium* strains (wild-type SL1344 and its mutant derivatives) used in  
362 this study were listed in *SI Appendix*, Table S1. pET28a vector-based  
363 complementation plasmids were introduced into *S. Typhimurium* by electroporation  
364 (2.5 kV, 200  $\Omega$ , 25  $\mu$ F and 5 ms). Bacteria were cultured in LB Broth at 37 °C on a  
365 shaker (220 rpm/min). When necessary, cultures were supplemented with antibiotics  
366 at the following final concentrations: streptomycin, 100  $\mu$ g mL<sup>-1</sup>; ampicillin, 100  $\mu$ g  
367 mL<sup>-1</sup>; kanamycin, 50  $\mu$ g mL<sup>-1</sup>.

368 The procedure for bacterial infection of mammalian cells was performed as  
369 previously described. Briefly, wild-type and mutant *Salmonella* were cultured  
370 overnight (approximately 16 h) at 37 °C on a shaker (220 rpm/min) and then were  
371 subcultured at 1:33 dilution in LB without antibiotics for 3 h. Bacteria were diluted in  
372 serum-free and antibiotics-free DMEM, and added to cells at a multiplicity of  
373 infection (MOI) of 100 for 30 min at 37 °C. 24-well plates were centrifuged at 700g  
374 for 5 min at room temperature to promote and synchronize infection. Extracellular  
375 bacteria were removed by extensive washing with PBS, and culture media was  
376 replaced with medium containing 100  $\mu$ g mL<sup>-1</sup> gentamicin. Cells were incubated at 37  
377 °C, 5% CO<sub>2</sub> for a further 1.5 h, and the culture medium was replaced with a medium  
378 containing 20  $\mu$ g mL<sup>-1</sup> gentamicin. Infected cells were incubated to the indicated time



379 at 37 °C in a 5% CO<sub>2</sub> incubator. Samples were processed further for  
380 immunoprecipitation or immunofluorescence.

381 To measure the *S. Typhimurium* replication fold, RAW264.7 cells were infected  
382 with indicated *Salmonella* strains at an MOI of 10. Infection was facilitated by  
383 centrifugation at 700 g for 5 min at room temperature. After 30 min incubation at 37  
384 °C, cells were washed three times with PBS to remove extracellular bacteria and  
385 incubated with fresh DMEM containing 100 µg mL<sup>-1</sup> gentamicin. At 2 h  
386 post-infection, the gentamicin concentration was reduced to 20 µg mL<sup>-1</sup>. At 2 h and 24  
387 h post-infection, cells were lysed in cold PBS containing 1% Triton X-100, and  
388 colony-forming units were determined by serial-dilution plating on agar plates  
389 containing 100 µg mL<sup>-1</sup> streptomycin and 50 µg mL<sup>-1</sup> kanamycin. The replication fold  
390 was determined by dividing the number of intracellular bacteria at 24 h by the number  
391 at 2 h.

#### 392 **Plasmids, antibodies and reagents.**

393 Plasmids used in this study were listed in *SI Appendix*, Table S2. Genes coding  
394 for SseK1, SseK2, and SseK3 DNA were amplified from genomic DNA of *S.*  
395 *Typhimurium* strain SL1344 and were inserted into pCS2-EGFP, pCS2-RFP,  
396 pCS2-Flag, and pCS2-HA, respectively for transient expression in mammalian cells.  
397 For complementation in *S. Typhimurium*  $\Delta sseK1/2/3$  strain, DNA fragment  
398 containing genes encoding SseK1, SseK2, and SseK3, each together with their

399 upstream promoter regions, was amplified from *S. Typhimurium* SL1344 genomic  
400 DNA and inserted into pET28A. cDNAs for SNAP23, SNAP25, VAMP8, Syntaxin7,  
401 Syntaxin8, Vti1b, Sec22b, Snapin, Rab1 and TRM32 were amplified from a cDNA  
402 library of HeLa cells. For mammalian expression, cDNAs were cloned into  
403 pCS2-EGFP and pCS2-Flag vectors. Truncation, deletion, and point-mutation mutants  
404 were constructed by the standard PCR cloning strategy. All plasmids were verified by  
405 sequencing analysis. Antibodies and reagents were listed in *SI Appendix*, Table S3.

406 **Cell culture, transfection and stable cell-line construction.**

407 293T, HeLa cells were obtained from the American Type Culture Collection  
408 (ATCC) and were maintained in DMEM (HyClone) supplemented with 10% FBS  
409 (Gibco), 2 mM L-glutamine, 100U mL<sup>-1</sup> penicillin, and 100 µg mL<sup>-1</sup> streptomycin.  
410 Cells were cultivated in a humidified atmosphere containing 5% CO<sub>2</sub> at 37 °C.

411 Transient transfection was performed using Vigofect (Vigorus) or Jetprime  
412 (Polyplus) reagents following the manufacturers' instructions. For siRNA  
413 knockdown, 200 pmol of siRNAs were transfected into 2 × 10<sup>6</sup> RAW264.7 cells.

414 Sense sequences for the siRNAs used are as follows: *trim32* 1#

415 5'-CCATCTGCATGGAGTCCTTTT -3', *trim32* 2#:

416 5'-CCAAGTGTTCAACCGCAAATT-3', *trim32* 3#: 5'-GCTATCAT

417 CTGAGAAGATATT-3', and negative control (NC): 5'-TTCTCCGAACGTGTCAC

418 GT-3'.

419 To generate the cell line that stably expresses EGFP-VAMP8,  
420 pcDNA4-EGFP-VAMP8 was transfected into 293T cells. Cell emitting green  
421 fluorescence obtained by fluorescence-activated cell sorting were cultured in DMEM  
422 medium supplemented with 10% FBS, 1% v/v penicillin/streptomycin, and 50  $\mu\text{g}$   
423  $\text{mL}^{-1}$  zeocin. Knockout cell lines were generated by the CRISPR-Cas9 method as  
424 previously described (ref). Briefly, the pHKO plasmid containing the guide RNA  
425 targeting *Trim32* was co-transfected with packaging plasmid psPAX2 and envelope  
426 plasmid pMD2.G into Cas9-expressed 293T cell. The transfection cocktail was  
427 removed after 6 h and replaced by fresh medium. After 72 h, viral containing  
428 supernatant was collected and filtered with 0.45  $\mu\text{m}$  membrane, and stored at 4  $^{\circ}\text{C}$   
429 before transduction. 293T cells were transduced with the lentiviral particles. Three  
430 days later, GFP-positive cells were sorted into single clones in 96-well plates by flow  
431 cytometry and knockout lines were identified by PCR and by Western blot with  
432 antibodies specific for TRIM32. The sequence for the guide RNA used for *trim32*  
433 knockout is 5'-CCAGTTTGTAGTAACCGATG-3'.

#### 434 **Immunoprecipitation.**

435 For immunoprecipitation, 293T cells at a confluency of 60-70% in 6-well plates  
436 were transfected with a total of 5  $\mu\text{g}$  plasmids that code for the protein of interest.  
437 Twenty-four hours after transfection, cells were washed once with PBS and lysed in  
438 buffer A containing 25 mM Tris-HCl, pH 7.5, 150 mM NaCl, 10% glycerol, and 1%

439 Triton X-100, supplemented with a protease inhibitor mixture (Roche Molecular  
440 Biochemicals). Pre-cleared lysates were subjected to anti-Flag M2 or anti-GFP  
441 immunoprecipitation following the manufacturer's instructions. The beads were  
442 washed four times with lysis buffer, and the immunoprecipitates were eluted by SDS  
443 sample buffer followed by standard immunoblotting analysis. All the  
444 immunoprecipitation assays were performed more than three times, and representative  
445 results were shown. For enrichment of the arginine-GlcNAcylated proteins from  
446 lysates of transfected cells, samples were washed three times in ice-cold PBS and  
447 lysed in buffer A containing 25 mM Tris-HCl, pH 7.5, 150 mM NaCl, 10% glycerol,  
448 and 1% Triton X-100, supplemented with a protease inhibitor mixture (Roche  
449 Molecular Biochemicals). Pre-cleared lysates were subjected to immunoprecipitation  
450 with the anti-Arg-GlcNAc antibodies (Pan et al., 2014). The beads were washed four  
451 times with the lysis buffer, and the immunoprecipitates were dissolved by SDS  
452 sample buffer.

#### 453 **Immunofluorescence labeling and confocal microscopy.**

454 At the indicated time point post-transfection or bacterial infection, cells were  
455 fixed for 10 min with 4% PFA in PBS and permeabilized for 15 min with 0.2% Triton  
456 X-100 in PBS. After blockade of nonspecific binding by incubation of cells for 30  
457 min with 2% bovine serum albumin (BSA) in PBS, coverslips were incubated with  
458 the appropriate primary antibodies and subsequently with fluorescein-labeled

459 secondary antibodies (ThermoFisher). Confocal fluorescence images were acquired at  
460 the confocal microscope (Spinning Disc, Leica). All image data shown are  
461 representative of at least three randomly selected fields.

#### 462 **Expression and purification of recombinant proteins.**

463 Protein expression was induced in *E. coli* BL21(DE3) strain (Novagen)  
464 harboring the appropriate plasmid that directs the protein of interest at 22°C for 15 h  
465 with 0.4 mM isopropyl- $\beta$ -D-thiogalactopyranoside (IPTG) after the cultures have  
466 reached an OD<sub>600</sub> of 0.8–1.0. Affinity purification of GST-SseK3 was performed  
467 using glutathione sepharose (GE Healthcare), and purification of  
468 6×His-SUMO-hUBE1, 6×His-TRIM32, 6×His-TRIM32 ( $\Delta$ RING), and  
469 6×His-Flag-Ub was conducted using Ni-NTA agarose (Qiagen), following the  
470 manufacturer’s instructions. Proteins were concentrated in a buffer containing 20 mM  
471 HEPES pH 7.5, 150mM NaCl, and 5% glycerol. The protein concentration was  
472 determined by the Bradford method (ref).

#### 473 ***In vitro* ubiquitination assays.**

474 To assay ubiquitination of SseK3 *in vitro*, Ubiquitin (5  $\mu$ g), E1 (200 ng),  
475 UBCH5a (300 ng), His-TRIM32 (0.8  $\mu$ g) and GST-SseK3 (2  $\mu$ g) were incubated with  
476 2 mM ATP at 37°C for 2 h in ubiquitin assay buffer (20 mM Tris-HCl pH 7.5, 5 mM  
477 MgCl<sub>2</sub>, 2 mM DTT). Reactions were stopped by adding 30 mM EDTA and 15 mM  
478 DTT. After GST pull-down, the sample was washed with 1 M urea for 60 min to

479 exclude potential binding of unanchored polyubiquitin, then the sample was placed in  
480 an SDS-loading buffer and boiled at 95°C for 5 min. Samples were subsequently  
481 analyzed by SDS-PAGE followed by Western blotting.

#### 482 **Mass spectrometric analyses.**

483 For identification of the GlcNAcylated arginine and arginine-containing  
484 peptides, purified SNAP25 protein was subjected to digestion with GluC and LysC,  
485 and the resulting peptides were separated on an EASY-nLC 1200 system (Thermo  
486 Fisher Scientific). The nano liquid chromatography gradient was as follows: 0-8% B  
487 in 3 min, 8-28% B in 42 min, 28-38% B in 5 min, 38-100% B in 10 min (solvent A:  
488 0.1% Formic acid in water, solvent B: 80% CH<sub>3</sub>CN in 0.1% formic acid). Peptides  
489 eluted from the capillary column were applied directly onto a Q Exactive Plus mass  
490 spectrometer by electrospray (Thermo Fisher Scientific) for mass spectrometry (MS)  
491 and MS/MS analyses. Searches were performed against the amino acid sequence of  
492 SNAP25 and were performed with cleavage specificity allowing four mis-cleavage  
493 events. Searches were performed with the variable modifications of oxidation of  
494 methionine, *N*-Acetyl-hexosamine addition to arginine (Arg-GlcNAc), and acetylation  
495 of protein N termini. For identification of the SNAP25-binding protein,  
496 immunoprecipitates were separated using SDS-PAGE, fixed, and visualized after  
497 silver staining as recommended by the manufacturer. An entire lane of bands was  
498 excised and subjected to in-gel trypsin digestion and MS/MS detections as described

499 above. Identification of proteins was carried out using the Proteome Discoverer 2.2  
500 program. Searches were performed against the Human proteomes depending on the  
501 samples with carbamidomethylation of cysteine set as a fixed modification. The  
502 precursor mass tolerance was set to 10 parts-per-million (ppm) and a fragment mass  
503 tolerance of 0.02 Da. A maximum false discovery rate (FDR) of 1.0% was set for  
504 protein and peptide identifications.

### 505 **Quantification and statistical analysis.**

506 All results are presented as mean  $\pm$  standard deviation containing a specified  
507 number of replicates. Data were analyzed using a Student's *t*-test to compare two  
508 experimental groups. The comparison of multiple groups was conducted by using the  
509 one-way analysis of variance (ANOVA). A difference is considered significant as the  
510 following: \* $P < 0.05$ , \*\* $P < 0.01$ .

511

### 512 **Compliance and ethics**

513 All authors declare no competing interests. This study does not involve human  
514 subjects and animals.

515

### 516 **Author Contributions**

517 S.L. and K.M. conceived the study. K.M. and J.Y. designed and performed the  
518 functional experiments. K.M. and J.X. conducted the mass spectrometry experiments.

519 L.S. provided technical assistance in the analyses of the mass spectrometry data. J.L.  
520 and P.Z. provided assistance in preparing experiments materials. S.L. and K.M.  
521 analyzed the data and wrote the manuscript. All authors discussed the results and  
522 commented on the manuscript.

523

## 524 **Acknowledgments**

525 We thank members of the Li laboratory and the central laboratory of Taihe  
526 hospital for helpful discussions and technical assistance. We thank Prof. Hongbing  
527 Shu and Prof. Bo Zhong in Wuhan University (China) for providing the pRK-HA-Ub  
528 (K48 only), and pRK-HA-Ub (K63 only) plasmids. We thank Prof. Gang Cao in  
529 Huazhong Agricultural University (China) for providing the pHKO14-Cas9-Flag, and  
530 pHKO-GFP-sgRNA plasmids. This work was supported by the National Key  
531 Research and Development Programs of China 2021YFD1800404 and  
532 2018YFA0508000, Huazhong Agricultural University Scientific & Technological  
533 Self-Innovation Foundation 2017RC003 to S.L., and Hubei Provincial Natural  
534 Science Foundation 2021CFB472 to K.M..

535

## 536 **References**

537 Acheson, D., and Hohmann, E.L. (2001). Nontyphoidal salmonellosis. *Clinical*  
538 *Infectious Diseases* 32, 263-269.



- 539 Avraham, R., Haseley, N., Brown, D., Penaranda, C., Jijon, H.B., Trombetta, J.J.,  
540 Satija, R., Shalek, A.K., Xavier, R.J., and Regev, A. (2015). Pathogen cell-to-cell  
541 variability drives heterogeneity in host immune responses. *Cell* *162*, 1309-1321.
- 542 Bernal-Bayard, J., Cardenal-Muñoz, E., and Ramos-Morales, F. (2010). The  
543 Salmonella type III secretion effector, salmonella leucine-rich repeat protein (SlrP),  
544 targets the human chaperone ERdj3. *Journal of Biological Chemistry* *285*,  
545 16360-16368.
- 546 Bernal-Bayard, J., and Ramos-Morales, F. (2009). Salmonella type III secretion  
547 effector SlrP is an E3 ubiquitin ligase for mammalian thioredoxin. *Journal of*  
548 *Biological Chemistry* *284*, 27587-27595.
- 549 Bhavsar, A.P., Brown, N.F., Stoepel, J., Wiermer, M., Martin, D.D., Hsu, K.J.,  
550 Imami, K., Ross, C.J., Hayden, M.R., and Foster, L.J. (2013). The Salmonella type III  
551 effector SspH2 specifically exploits the NLR co-chaperone activity of SGT1 to  
552 subvert immunity. *PLoS pathogens* *9*, e1003518.
- 553 Clague, M.J., and Urbé, S. (2010). Ubiquitin: same molecule, different degradation  
554 pathways. *Cell* *143*, 682-685.
- 555 D'Costa, V.M., Coyaud, E., Boddy, K.C., Laurent, E.M., St-Germain, J., Li, T.,  
556 Grinstein, S., Raught, B., and Brumell, J.H. (2019). BioID screen of Salmonella type  
557 3 secreted effectors reveals host factors involved in vacuole positioning and stability  
558 during infection. *Nature microbiology* *4*, 2511-2522.
- 559 Dikic, I. (2017). Proteasomal and autophagic degradation systems. *Annual review of*  
560 *biochemistry* *86*, 193-224.
- 561 Dos Santos, A.M., Ferrari, R.G., and Conte-Junior, C.A. (2020). Type three secretion  
562 system in Salmonella Typhimurium: the key to infection. *Genes & genomics* *42*,  
563 495-506.
- 564 Eisenberg-Lerner, A., Benyair, R., Hizkiahou, N., Nudel, N., Maor, R., Kramer, M.P.,  
565 Shmueli, M.D., Zigdon, I., Cherniavsky Lev, M., and Ulman, A. (2020). Golgi  
566 organization is regulated by proteasomal degradation. *Nature communications* *11*,  
567 1-14.
- 568 Fiskin, E., Bhogaraju, S., Herhaus, L., Kalayil, S., Hahn, M., and Dikic, I. (2017).  
569 Structural basis for the recognition and degradation of host TRIM proteins by  
570 Salmonella effector SopA. *Nature communications* *8*, 1-14.
- 571 Galán, J.E. (2021). Salmonella Typhimurium and inflammation: a pathogen-centric  
572 affair. *Nature Reviews Microbiology* *19*, 716-725.
- 573 Guo, X. (2022). Localized Proteasomal Degradation: From the Nucleus to Cell  
574 Periphery. *Biomolecules* *12*, 229.

- 575 Haraga, A., and Miller, S.I. (2006). A Salmonella type III secretion effector interacts  
576 with the mammalian serine/threonine protein kinase PKN1. *Cellular microbiology* 8,  
577 837-846.
- 578 Harbury, P.A. (1998). Springs and zippers: coiled coils in SNARE-mediated  
579 membrane fusion. *Structure* 6, 1487-1491.
- 580 Herhaus, L., and Dikic, I. (2018). Regulation of Salmonella-host cell interactions via  
581 the ubiquitin system. *International Journal of Medical Microbiology* 308, 176-184.
- 582 Hermanns, T., and Hofmann, K. (2019). Bacterial DUBs: deubiquitination beyond the  
583 seven classes. *Biochemical Society Transactions* 47, 1857-1866.
- 584 Hwang, J., and Qi, L. (2018). Quality control in the endoplasmic reticulum: crosstalk  
585 between ERAD and UPR pathways. *Trends in biochemical sciences* 43, 593-605.
- 586 Jennings, E., Thurston, T.L., and Holden, D.W. (2017). Salmonella SPI-2 type III  
587 secretion system effectors: molecular mechanisms and physiological consequences.  
588 *Cell Host & Microbe* 22, 217-231.
- 589 Kamanova, J., Sun, H., Lara-Tejero, M., and Galán, J.E. (2016). The Salmonella  
590 effector protein SopA modulates innate immune responses by targeting TRIM E3  
591 ligase family members. *PLoS pathogens* 12, e1005552.
- 592 Kehl, A., Göser, V., Reuter, T., Liss, V., Franke, M., John, C., Richter, C.P., Deiwick,  
593 J., and Hensel, M. (2020). A trafficome-wide RNAi screen reveals deployment of  
594 early and late secretory host proteins and the entire late endo-/lysosomal vesicle  
595 fusion machinery by intracellular Salmonella. *PLoS pathogens* 16, e1008220.
- 596 Keszei, A.F., Tang, X., McCormick, C., Zeqiraj, E., Rohde, J.R., Tyers, M., and  
597 Sicheri, F. (2014). Structure of an SspH1-PKN1 complex reveals the basis for host  
598 substrate recognition and mechanism of activation for a bacterial E3 ubiquitin ligase.  
599 *Molecular and cellular biology* 34, 362-373.
- 600 Knuff, K., and Finlay, B.B. (2017). What the SIF is happening—the role of  
601 intracellular Salmonella-induced filaments. *Frontiers in cellular and infection*  
602 *microbiology* 7, 335.
- 603 Koepke, L., Gack, M.U., and Sparrer, K.M. (2021). The antiviral activities of TRIM  
604 proteins. *Current Opinion in Microbiology* 59, 50-57.
- 605 Lazzari, E., and Meroni, G. (2016). TRIM32 ubiquitin E3 ligase, one enzyme for  
606 several pathologies: From muscular dystrophy to tumours. *The international journal*  
607 *of biochemistry & cell biology* 79, 469-477.
- 608 Liss, V., Swart, A.L., Kehl, A., Hermanns, N., Zhang, Y., Chikkaballi, D., Böhles, N.,  
609 Deiwick, J., and Hensel, M. (2017). Salmonella enterica remodels the host cell

- 610 endosomal system for efficient intravacuolar nutrition. *Cell host & microbe* *21*,  
611 390-402.
- 612 Lou, L., Zhang, P., Piao, R., and Wang, Y. (2019). Salmonella pathogenicity island 1  
613 (SPI-1) and its complex regulatory network. *Frontiers in cellular and infection*  
614 *microbiology* *9*, 270.
- 615 Meng, K., Zhuang, X., Peng, T., Hu, S., Yang, J., Wang, Z., Fu, J., Xue, J., Pan, X.,  
616 and Lv, J. (2020). Arginine GlcNAcylation of Rab small GTPases by the pathogen  
617 *Salmonella Typhimurium*. *Communications biology* *3*, 1-13.
- 618 Mesquita, F.S., Holden, D.W., and Rolhion, N. (2013). Lack of effect of the  
619 *Salmonella* deubiquitinase SseL on the NF- $\kappa$ B pathway. *PLoS One* *8*, e53064.
- 620 Nakagawa, T., Shirane, M., Iemura, S.i., Natsume, T., and Nakayama, K.I. (2007).  
621 Anchoring of the 26S proteasome to the organellar membrane by FKBP38. *Genes to*  
622 *Cells* *12*, 709-719.
- 623 Newson, J.M., Scott, N., Chung, I.Y.W., Lung, T.W.F., Giogha, C., Gan, J., Wang,  
624 N., Strugnell, R.A., Brown, N.F., and Cygler, M. (2019). Salmonella Effectors SseK1  
625 and SseK3 Target Death Domain Proteins in the TNF and TRAIL Signaling  
626 Pathways\*[S]. *Molecular & Cellular Proteomics* *18*, 1138-1156.
- 627 Noster, J., Chao, T.-C., Sander, N., Schulte, M., Reuter, T., Hansmeier, N., and  
628 Hensel, M. (2019). Proteomics of intracellular *Salmonella enterica* reveals roles of  
629 *Salmonella* pathogenicity island 2 in metabolism and antioxidant defense. *PLoS*  
630 *pathogens* *15*, e1007741.
- 631 Otten, E.G., Werner, E., Crespillo-Casado, A., Boyle, K.B., Dharamdasani, V., Pathe,  
632 C., Santhanam, B., and Randow, F. (2021). Ubiquitylation of lipopolysaccharide by  
633 RNF213 during bacterial infection. *Nature* *594*, 111-116.
- 634 Pan, M., Li, S., Li, X., Shao, F., Liu, L., and Hu, H.G. (2014). Synthesis of and  
635 Specific Antibody Generation for Glycopeptides with Arginine N - GlcNAcylation.  
636 *Angewandte Chemie International Edition* *53*, 14517-14521.
- 637 Pan, X., Luo, J., and Li, S. (2020). Bacteria-catalyzed arginine glycosylation in  
638 pathogens and host. *Frontiers in cellular and infection microbiology* *10*, 185.
- 639 Ramachandran, K.V., Fu, J.M., Schaffer, T.B., Na, C.H., Delannoy, M., and Margolis,  
640 S.S. (2018). Activity-dependent degradation of the nascentome by the neuronal  
641 membrane proteasome. *Molecular cell* *71*, 169-177. e166.
- 642 Santos, J.C., and Enninga, J. (2016). At the crossroads: communication of bacteria -  
643 containing vacuoles with host organelles. *Cellular microbiology* *18*, 330-339.

- 644 Singh, Y., Saxena, A., Kumar, R., and Kumar Saxena, M. (2018). Virulence system of  
645 Salmonella with special reference to Salmonella enterica. *Salmonella-A Re-emerging*  
646 *Pathogen*.
- 647 Stein, M.A., Leung, K.Y., Zwick, M., Portillo, F.G.d., and Finlay, B.B. (1996).  
648 Identification of a Salmonella virulence gene required for formation of filamentous  
649 structures containing lysosomal membrane glycoproteins within epithelial cells.  
650 *Molecular microbiology* 20, 151-164.
- 651 Stévenin, V., Chang, Y.-Y., Le Toquin, Y., Duchateau, M., Gianetto, Q.G., Luk, C.H.,  
652 Salles, A., Sohst, V., Matondo, M., and Reiling, N. (2019). Dynamic growth and  
653 shrinkage of the Salmonella-containing vacuole determines the intracellular pathogen  
654 niche. *Cell reports* 29, 3958-3973. e3957.
- 655 Stévenin, V., Gai Gianetto, Q., Duchateau, M., Matondo, M., Enninga, J., and Chang,  
656 Y.-Y. (2021). Purification of infection-associated macropinosomes by magnetic  
657 isolation for proteomic characterization. *Nature protocols* 16, 5220-5249.
- 658 Tripathi - Giesgen, I., Behrends, C., and Alpi, A.F. (2021). The ubiquitin ligation  
659 machinery in the defense against bacterial pathogens. *EMBO reports* 22, e52864.
- 660 Tuli, A., and Sharma, M. (2019). How to do business with lysosomes: Salmonella  
661 leads the way. *Current opinion in microbiology* 47, 1-7.
- 662 Walczak, H., Iwai, K., and Dikic, I. (2012). Generation and physiological roles of  
663 linear ubiquitin chains. *BMC biology* 10, 1-6.
- 664 Xu, Y., Zhou, P., Cheng, S., Lu, Q., Nowak, K., Hopp, A.-K., Li, L., Shi, X., Zhou,  
665 Z., and Gao, W. (2019). A bacterial effector reveals the V-ATPase-ATG16L1 axis  
666 that initiates xenophagy. *Cell* 178, 552-566. e520.
- 667 Yang, Q., Liu, T.-T., Lin, H., Zhang, M., Wei, J., Luo, W.-W., Hu, Y.-H., Zhong, B.,  
668 Hu, M.-M., and Shu, H.-B. (2017). TRIM32-TAX1BP1-dependent selective  
669 autophagic degradation of TRIF negatively regulates TLR3/4-mediated innate  
670 immune responses. *PLoS pathogens* 13, e1006600.
- 671 Yang, Z., Soderholm, A., Lung, T.W.F., Giogha, C., Hill, M.M., Brown, N.F.,  
672 Hartland, E., and Teasdale, R.D. (2015). SseK3 is a Salmonella effector that binds  
673 TRIM32 and modulates the host's NF- $\kappa$ B signalling activity. *PloS one* 10, e0138529.
- 674 Ye, Z., Petrof, E.O., Boone, D., Claud, E.C., and Sun, J. (2007). Salmonella effector  
675 AvrA regulation of colonic epithelial cell inflammation by deubiquitination. *The*  
676 *American journal of pathology* 171, 882-892.
- 677 Zhang, Y., Higashide, W.M., McCormick, B.A., Chen, J., and Zhou, D. (2006). The  
678 inflammation - associated Salmonella SopA is a HECT - like E3 ubiquitin ligase.  
679 *Molecular microbiology* 62, 786-793.

## 680 **Figure Legends**

681 **Figure 1. SseK3 promotes SIF formation by modifying SNARE proteins during *S.***

682 ***Typhimurium* infection.**

683 (A-B) SseK3 promotes SIF formation during *S. Typhimurium* infection. HeLa cells  
684 stably expressing EGFP-VAMP8 were infected with the indicated *S. Typhimurium*  
685 strains for 10 h and analyzed for SIFs. (A) Representative images showing the  
686 distribution of VAMP8 (green) and *S. Typhimurium* (red). Scale bar, 10  $\mu\text{m}$ . (B) The  
687 rates of VAMP8-positive tubules for each sample are indicated. At least 50 cells were  
688 counted for samples from experiments done in triplicate. \* $P < 0.05$

689 (C) Detection of enriched Arg-GlcNAcylated proteins by silver staining. Lysates of  
690 293T cells transfected to express GFP or GFP-SseK3 were subjected to  
691 immunoprecipitation with Arg-GlcNAc-specific antibodies, precipitates separated by  
692 SDS-PAGE were detected by silver staining.

693 (D) Scatter plots of protein ratios as a function of their relative abundance. Proteins  
694 immunoprecipitated with an anti-Arg-GlcNAc antibody were subjected to LC-MS/MS  
695 analysis. The ratio was calculated as spectral counts in SseK3-transfected samples  
696 divided by those in GFP-transfected samples. Large ratios indicate preferential  
697 detection and modification in 293T cells transfected to express SseK3. Red dots  
698 correspond to SNARE proteins, and green dots correspond to Rab GTPase proteins.

699 (E) SseK3 but not SseK1 or SseK2 modifies SNARE proteins during *S. Typhimurium*  
700 infection. 293T cells expressing the indicated Flag-tagged SNARE proteins were  
701 infected with relevant *S. Typhimurium* strains. Lysates immunoprecipitated with the  
702 Flag-specific antibody were detected by immunoblotting with the indicated  
703 antibodies. Similar results were obtained from at least three independent experiments.  
704 (F) SNARE proteins are modified by SseK3 during *S. Typhimurium* infection. 293T  
705 cells expressing the indicated Flag-tagged SNARE-associated proteins were infected  
706 with *S. Typhimurium* strain  $\Delta sseK1/2/3(pSseK3)$ . The level of Arg-GlcNAcylation  
707 was obtained by measuring band intensity of Arg-GlcNAcylated proteins to total  
708 protein using the image J software.

709

710 **Figure 2. SseK3 interferes with the interactions between SNAP25 and VAMPs.**

711 (A) Schematic representation of the domain structure of known SNARE proteins.  
712 Each protein was represented by a rectangular bar and the localization of the  
713 t-SNARE coiled-coil domains and the v-SNARE coiled-coil domains are shown.  
714 (B) SseK3 modifies SNAP25 within the N-terminal domain during *S. Typhimurium*  
715 infection. Cells expressing the indicated domains of SNAP25 were infected with the  
716 indicated *S. Typhimurium* strains and the modification was detected by  
717 immunoblotting.

718 (C) Determination of modification sites by mass spectrometric analysis. Shown is the  
719 MS/MS spectrum of modified peptide <sup>28</sup>STRMLQLVEE<sup>38</sup>. The fragment ions b<sub>6</sub> to  
720 b<sub>10</sub> have a mass increase of 406 Da corresponding to the addition of two GlcNAc  
721 while y<sub>1</sub> to y<sub>6</sub> fragments lack such a mass shift, indicating that GlcNAcylation occurs  
722 on Arg30 and Arg31.

723 (D) Validation of Arg30 and Arg31 as the main modification sites of SNAP25 by  
724 SseK3. 293T cells expressing the indicated Flag-tagged SNAP25 mutants were  
725 infected with *S. Typhimurium* strain  $\Delta$ *sseK1/2/3*(pSseK3), samples lysed were  
726 immunoprecipitated with anti-Flag beads and detected with antibodies specific for the  
727 Arg-GlcNAcylation. The levels of modification were quantitated by measuring the  
728 ratio of band intensity for modified and total proteins with Image J.

729 (E) 3D structure visualization of Arg30 and Arg31 in SNAP25 (PBD number: 5LOW)  
730 and in the SNAP25-syntaxin1 complex (PBD number:3RK2). Note the role of the two  
731 residues in interactions between these two proteins.

732 (F) Quantification of SNAP25-binding proteins in cells expressing SseK3. Proteins  
733 that potentially bind SNAP25 were obtained by IP from cells transfected to express  
734 SseK3 were analyzed by mass spectrometry, cells transfected with the vector were  
735 used as controls. Scatter plots of protein ratios as a function of their relative  
736 abundance (denoted by MS/MS spectral counts). The ratio is calculated as spectral  
737 counts in SseK3 transfected samples divided by those in controls. Lower ratios

738 indicate decreased binding efficiency with SNAP25. Green dots correspond to Snapin  
739 and VAMPs, and the red dot corresponds to immunoprecipitated SNAP25. Results  
740 shown are a representative of three independent experiments with similar results.

741 (G) SseK3 interferes with the interactions between SNAP25 with VAMP8. Lysates of  
742 cells transfected to express the indicated protein combinations were subjected to IP  
743 with Flag-specific antibody. The products were detected for the presence of the  
744 binding partners by immunoblotting. Similar results were obtained in three  
745 independent experiments.

746

747 **Figure 3. SseK3 limits the size of SNAP25-labeled SCVs.**

748 (A) The effects of the SseK family proteins on the size of SNAP25-containing  
749 vacuole (SNAP25-CV) during *S. Typhimurium* infection. HeLa cells transfected to  
750 express GFP-SNAP25 were infected with the indicated *S. Typhimurium* strains. The  
751 diameter of SNAP25-CV was measured at the indicated time points.

752 (B-C) The effects of SseK3 on the size of SNAP25-CV. HeLa cells transfected to  
753 express GFP-SNAP25 were infected with the indicated *S. Typhimurium* strains for 6  
754 h. The distribution of SNAP25 (green) and *S. Typhimurium* (red) are shown in B.  
755 Statistics of the diameter of SCVs positive for GFP-SNAP25 are shown in C.

756 (D-E) Ectopic expression of SseK3 limits the size of SNAP25-CV. HeLa cells  
757 transfected to express GFP-SNAP25 and Flag-SseK3 were infected with the indicated



758 *S. Typhimurium* strains for 6 h. The distribution of GFP-SNAP25 (green), *S.*  
759 *Typhimurium* (red), and Arg-GlcNAcylated proteins (blue) were shown (D). Statistics  
760 of the diameter of the SNAP25 positive SCVs are shown in E. Arrow-heads indicate  
761 the co-localization of SNAP25 and Arg-GlcNAcylation on the vacuoles. At least 30  
762 cells in A, C and E were analyzed for each experiment. Scale bar, 10  $\mu$ m. \* $P$ <0.05,  
763 \*\* $P$ <0.01.

764

765 **Figure 4. Expression of the host E3 ligase gene *trim32* is induced in response to *S.***  
766 ***Typhimurium* infection.**

767 (A) Diagrams of the *TRIM32* locus based on RNA sequencing reads. Enriched  
768 RNA-seq signals (Avraham et al., 2015) visualized by Integrated Genome Browser  
769 are representative of three independent experiments. UTR, the untranslated region.  
770 (B) qRT-PCR detection of *trim32* expression during *S. Typhimurium* infection. HeLa  
771 cells infected with *S. Typhimurium* strain SL1344 for the indicated time points were  
772 probed for the mRNA levels of *trim32*. The statistical data are expressed as means  $\pm$   
773 SD from three independent experiments. \* $P$ <0.05, \*\* $P$ <0.01.

774 (C) The induction of TRIM32 in response to *S. Typhimurium* infection measured by  
775 detecting protein. HeLa cells infected with *S. Typhimurium* strain SL1344 for the  
776 indicated time points were probed with TRIM32-specific antibodies. Tubulin was

777 detected as a loading control. Data shown are one representative from three  
778 independent experiments with similar results.  
779 (D-E) The effects of TRIM32 on SIF biogenesis. HeLa cells transfected to express  
780 GFP-VAMP8 and the indicated proteins for 12 h were infected with the indicated *S.*  
781 *Typhimurium* for 10 h. (D) The distribution of GFP-VAMP8 (green), *S. Typhimurium*  
782 (blue), and RFP or RFP-TRIM32 was shown. (E) Quantitation of cells showing  
783 VAMP8-positive tubules is indicated. At least 50 cells were counted for each  
784 experiment and the statistical data shown are from three independent experiments.  
785 Arrow-heads indicate the SIF structure. Scale bar, 10  $\mu\text{m}$ . \* $P < 0.05$

786

787 **Figure 5. TRIM32 interacts with and ubiquitinates SseK3.**

788 (A) A schematic representation of TRIM32 domain structure and the several TRIM32  
789 mutants used in this study. TRIM32 truncation mutants that retain the ability to  
790 interact with SseK3 are shown in red.  
791 (B) Mapping the domain important for TRIM32 to interact with SseK3. Flag-tagged  
792 full-length or several deletion mutants of TRIM32 was coexpressed GFP-SseK3 in  
793 293T cells and the interactions were determined by immunoprecipitation with beads  
794 coated with the Flag-specific antibody. Binding was detected by immunoblotting with  
795 GFP-specific antibodies. # marks the IgG in the IP blot.

796 (C) Overexpression of wild-type but not the mutant TRIM32 promotes ubiquitination  
797 of SseK3. 293T cells transfected to express GFP-SseK3 and TRIM32 or its mutants in  
798 the presence or absence of HA-ubiquitin. 18 h after transfection,  
799 co-immunoprecipitation was performed with anti-GFP antibodies, followed by  
800 standard immunoblotting analysis with the indicated antibodies.

801 (D) TRIM32 is required for ubiquitination of SseK3. The indicated cell lines,  
802 *trim32*<sup>+/+</sup>, *trim32*<sup>-/-</sup> and *trim32*<sup>-/-</sup> complemented with TRIM32 were transfected to  
803 express GFP-SseK3 for 16 h. Cells were treated with or without 25 μM MG132 for 12  
804 h prior to probing for the ubiquitination levels of GFP-SseK3 by immunoblotting.

805 (E) TRIM32-mediated ubiquitination of SseK3 occurs at the membrane components  
806 of SseK3. 293T cells were transfected with the indicated plasmids. Total membrane  
807 and cytosol proteins were isolated and immunoblotted with the corresponding  
808 antibodies. T: total protein. M: membrane fraction. C: cytoplasmic fraction. (F)  
809 TRIM32 catalyzes SseK ubiquitination *in vitro*. Recombinant His-TRIM32,  
810 GST-SseK3, ubiquitin, E1 (huBE1), and E2 (UBCH5c) were added as indicated for  
811 ubiquitination assays. After GST pull-down, ubiquitin-conjugated proteins were  
812 detected by immunoblot with a ubiquitin-specific antibody. The input levels of  
813 TRIM32 proteins were detected by immunoblots. Data shown are a representative of  
814 three independent experiments with similar results.

815

816 **Figure 6. TRIM32 catalyzes K48-linked ubiquitination to degrade**

817 **membrane-associated SseK3.**

818 (A) TRIM32 catalyzes K48-linked polyubiquitination of SseK3. 293T cells

819 transfected to express GFP-SseK3 and the indicated proteins. Lysates of the samples

820 were subjected to immunoprecipitation and immunoblot analysis with the indicated

821 antibodies.

822 (B) The stability of SseK3 probed by the CHX pulse chase-assay. 293T cells

823 transfected to express Flag-SseK3 were treated with CHX for the indicated time

824 points. Cells were treated with 25  $\mu$ M MG132 for 12 h before cell lysis (B). Total

825 membrane and cytosol proteins were isolated and immunoblotted with the

826 corresponding antibodies. M: membrane fraction. C: cytoplasmic fraction.

827 (C) Co-localization of TRIM32 and SseK3 on the Golgi apparatus in HeLa cells.

828 HeLa cells transfected to express the indicated proteins were fixed with 4%

829 paraformaldehyde and analyzed by confocal microscopy. The distribution of SseK3 or

830 GFP (green), RFP-TRIM32 or RFP (red), and GM130 (blue) was shown. Scale bar,

831 20  $\mu$ m.

832 (D) The effects of TRIM32 on the stability of SseK3. *trim32*<sup>+/+</sup>, *trim32*<sup>-/-</sup>, and *trim32*<sup>-/-</sup>

833 cells complemented with TRIM32 each was transfected to express GFP-SseK3.

834 Samples were treated with 100  $\mu$ g/mL CHX for 24 h and were separated into

835 membrane and cytosolic fractions. The presence of the relevant proteins in these

836 fractions was probed by immunoblotting with the appropriate antibodies. Data shown  
837 are a representative of three independent experiments with similar results.

838

839 **Figure 7. TRIM32 antagonizes SseK3-catalyzed-Arg-GlcNAcylation on SNAP25**  
840 **and restricts SseK3-SNARE-mediated SIF biogenesis and *Salmonella* replication.**

841 (A) TRIM32 targets SseK3 during *S. Typhimurium* infection. 293T cells transfected  
842 to express GFP-TRIM32 were infected with the indicated bacterial strains for 16 h.

843 The interactions between TRIM32 and SseK3 were detected by immunoprecipitation.

844 (B) The effects of TRIM32 on the SseK3-catalyzed-Arg-GlcNAcylation on SNAP25

845 during *S. Typhimurium* infection. *trim32*<sup>-/-</sup> cells transfected to express GFP-SNAP25

846 and the indicated proteins were infected with strain  $\Delta$ *sseK1/2/3*(pSsek3) for 10 h.

847 Chloramphenicol was added to inhibit the bacteria protein synthesis for another 12 h.

848 Lysed cells were separated into soluble and membrane fractions and the presence of

849 SseK3 was probed by immunoblotting. Data shown are a representative of three

850 independent experiments with similar results.

851 (C-D) The effects of TRIM32 on SseK3-SNARE-mediated SIF biogenesis. HeLa

852 cells transfected to express GFP-VAMP8 and the indicated proteins for 12 h were

853 infected with the indicated *S. Typhimurium* strains for 10 h. (C) The distribution of

854 VAMP8 (green), *S. Typhimurium* (blue), and RFP or RFP-TRIM32 was determined

855 by confocal microscopic analysis. Arrow-heads indicate the SIF structure. Scale bar,

856 10  $\mu$ m. (D) The rates of cells showing VAMP8-positive tubules are indicated. At least

857 50 cells were counted for each sample done in triplicate and statistic data shown are

858 from three independent experiments. \*\* $P < 0.01$ . NS: not significant.

859 (E-F) Effects of *trim32* knockdown on *Salmonella* replication in macrophage cells.

860 (E) Knockdown efficiency of *trim32* siRNA was detected by immunoblotting. (F)

861 RAW264.7 cells were transfected with 2# siRNA for *trim32* for 48 h, and then

862 subjected to infection with the indicated *S. Typhimurium* at a multiplicity of infection

863 of 10. Fold replication was determined by comparing bacterial counts at 2 and 24 h

864 post-infection. Results shown are mean values  $\pm$  SD (error bar) from three

865 independent experiments. \* $P < 0.05$ . \*\* $P < 0.01$ . NS: not significant.

866

867 **Figure 8. A schematic diagram of the regulation of *S. Typhimurium* intracellular**

868 **lifecycle by SseK3 and TRIM32.**

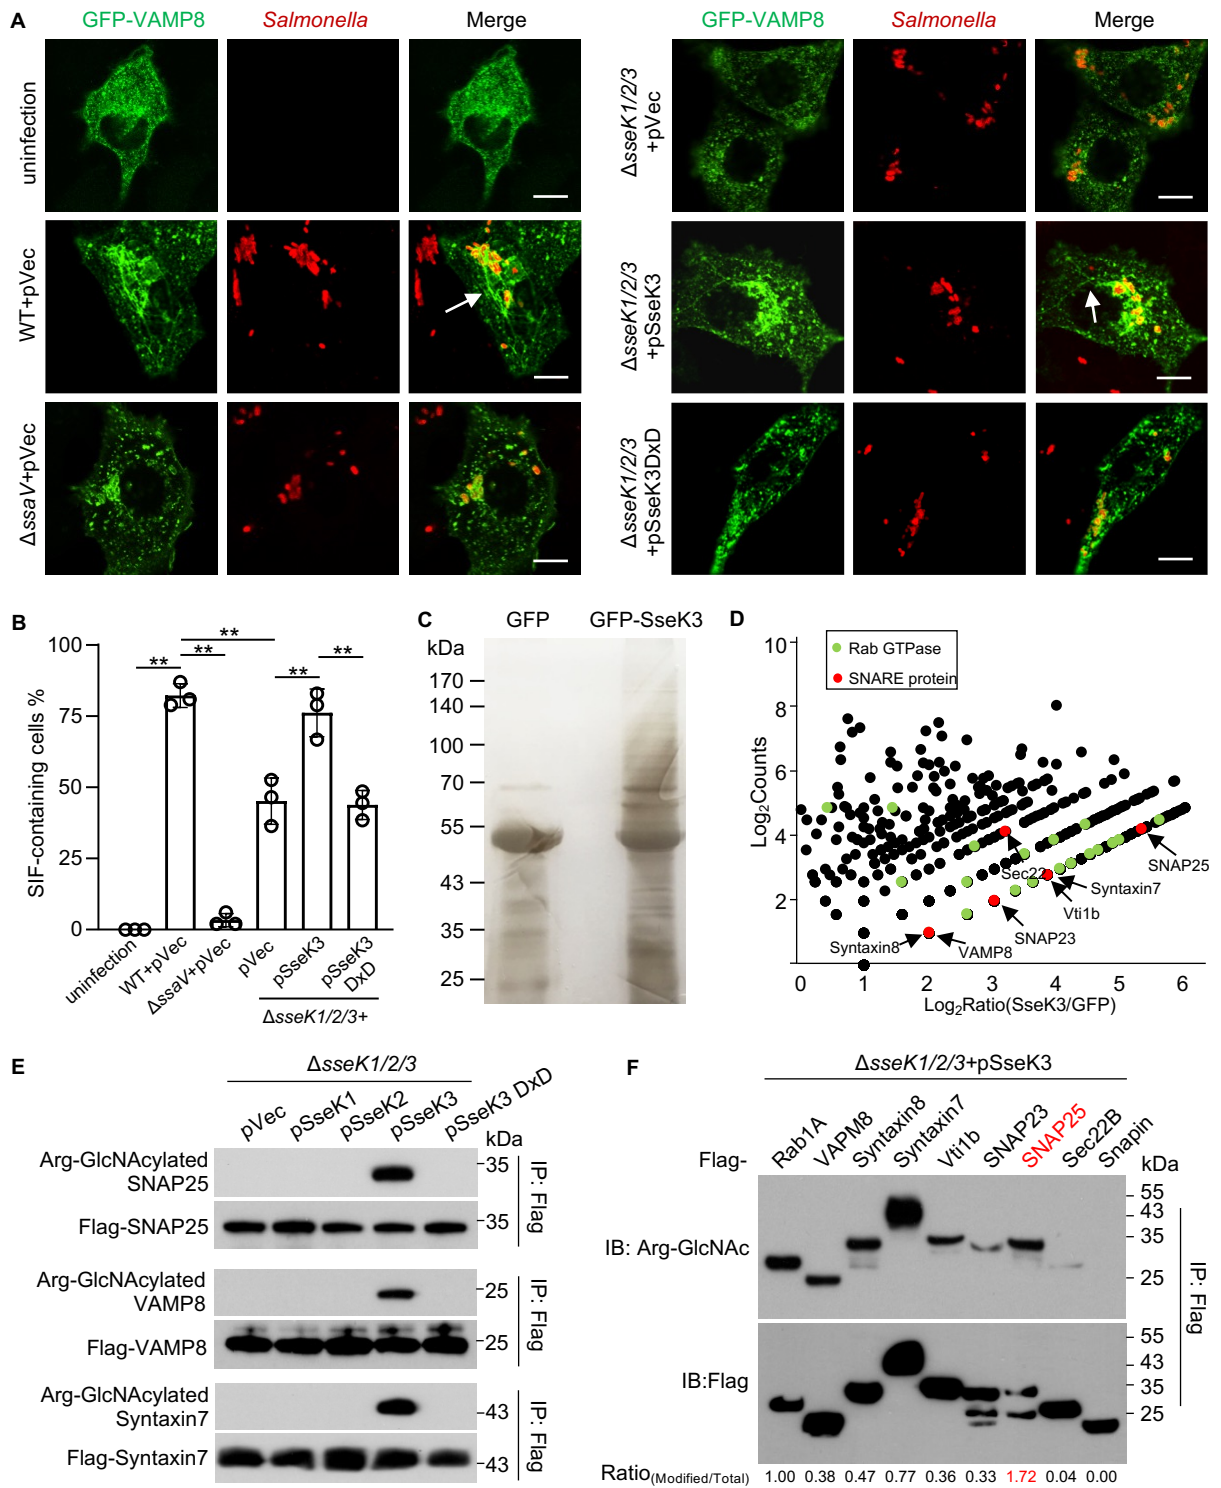

Figure 1

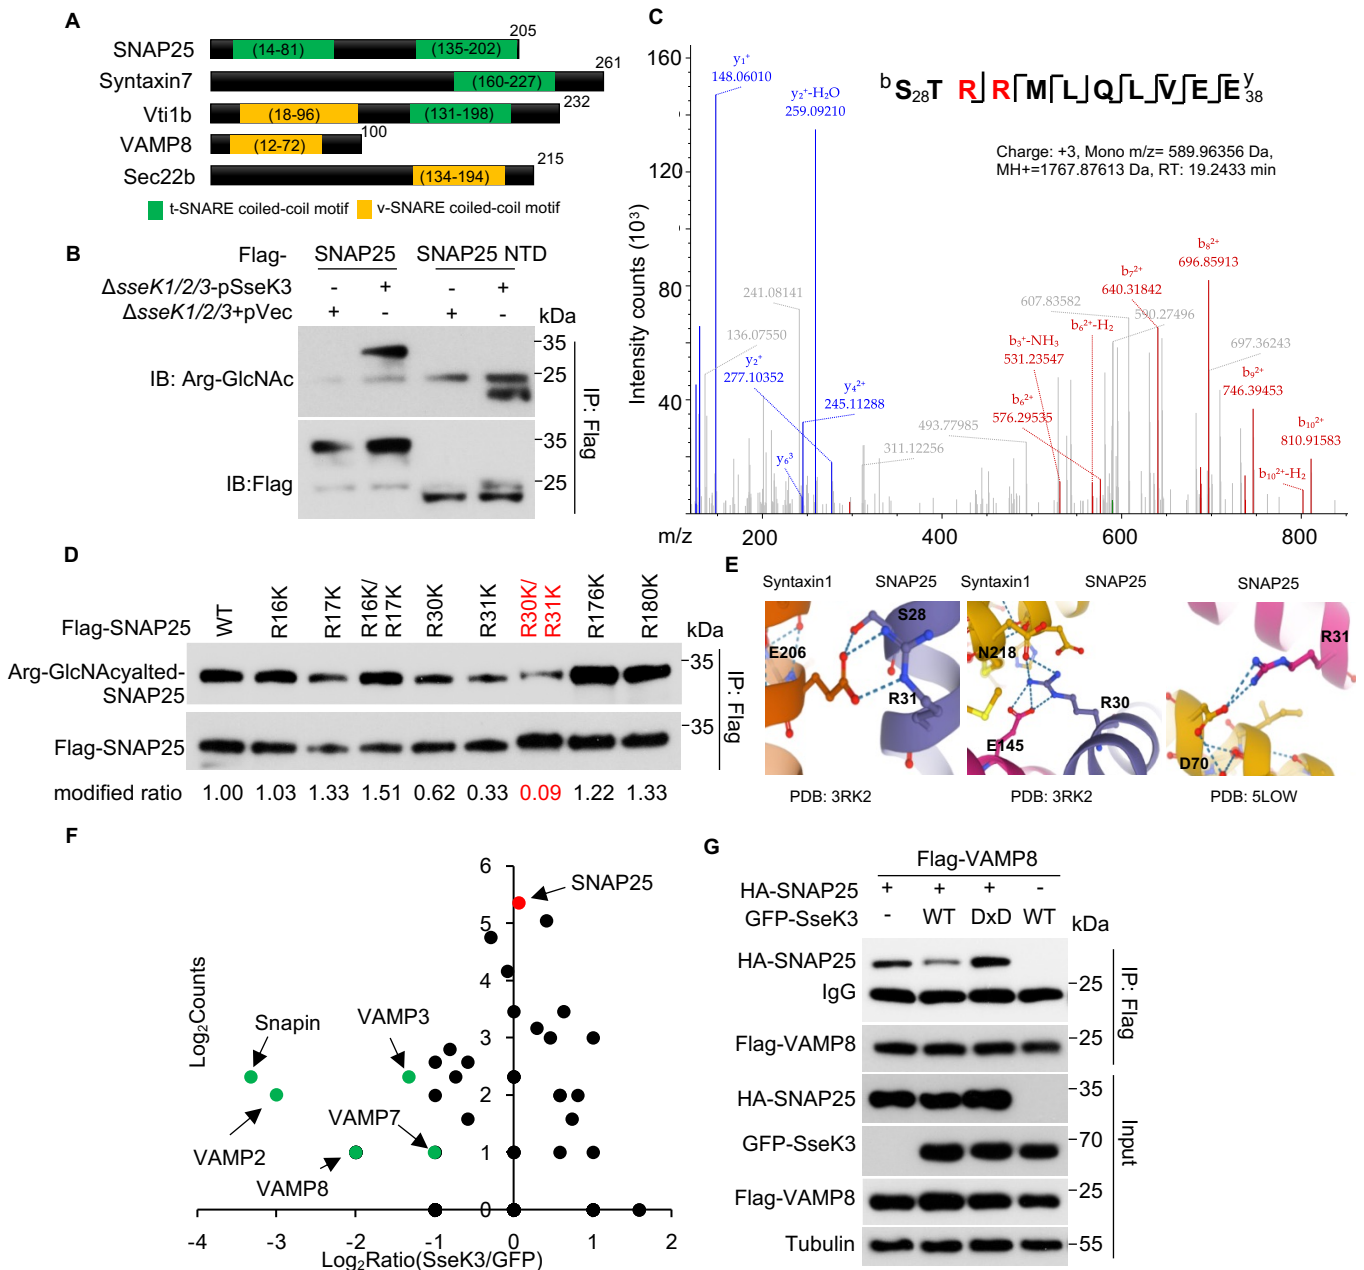

Figure 2



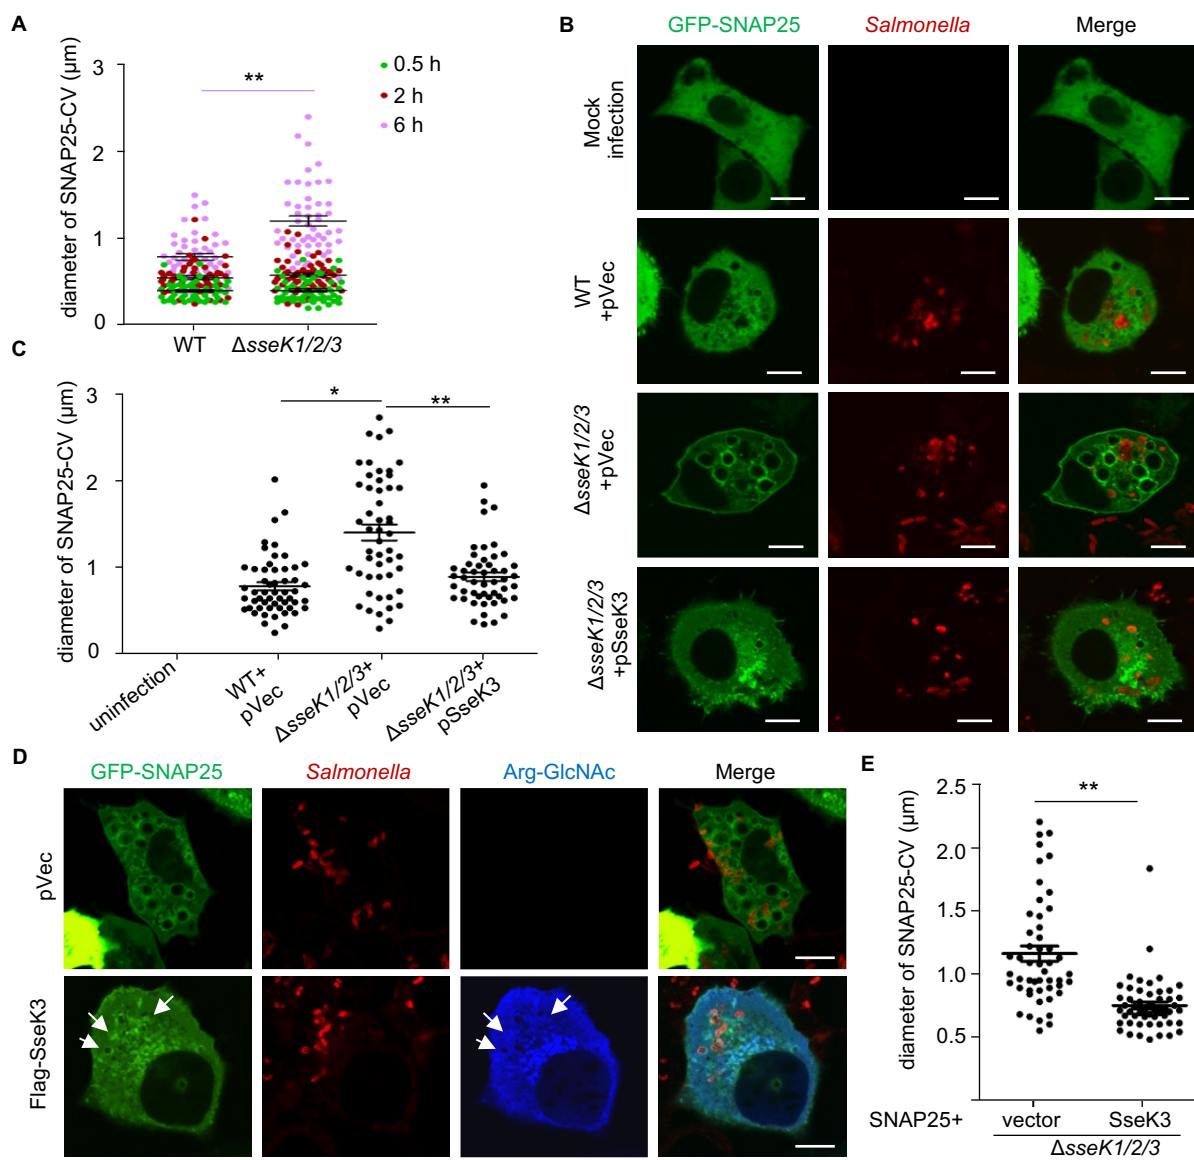

Figure 3

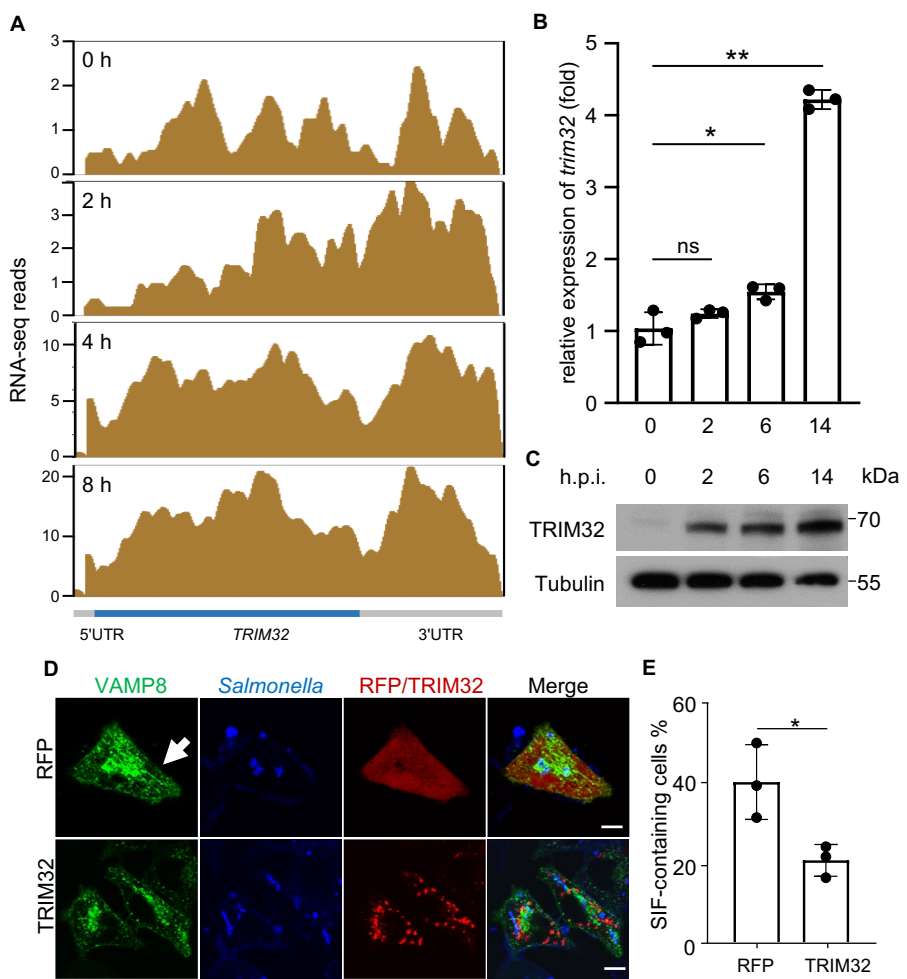

Figure 4

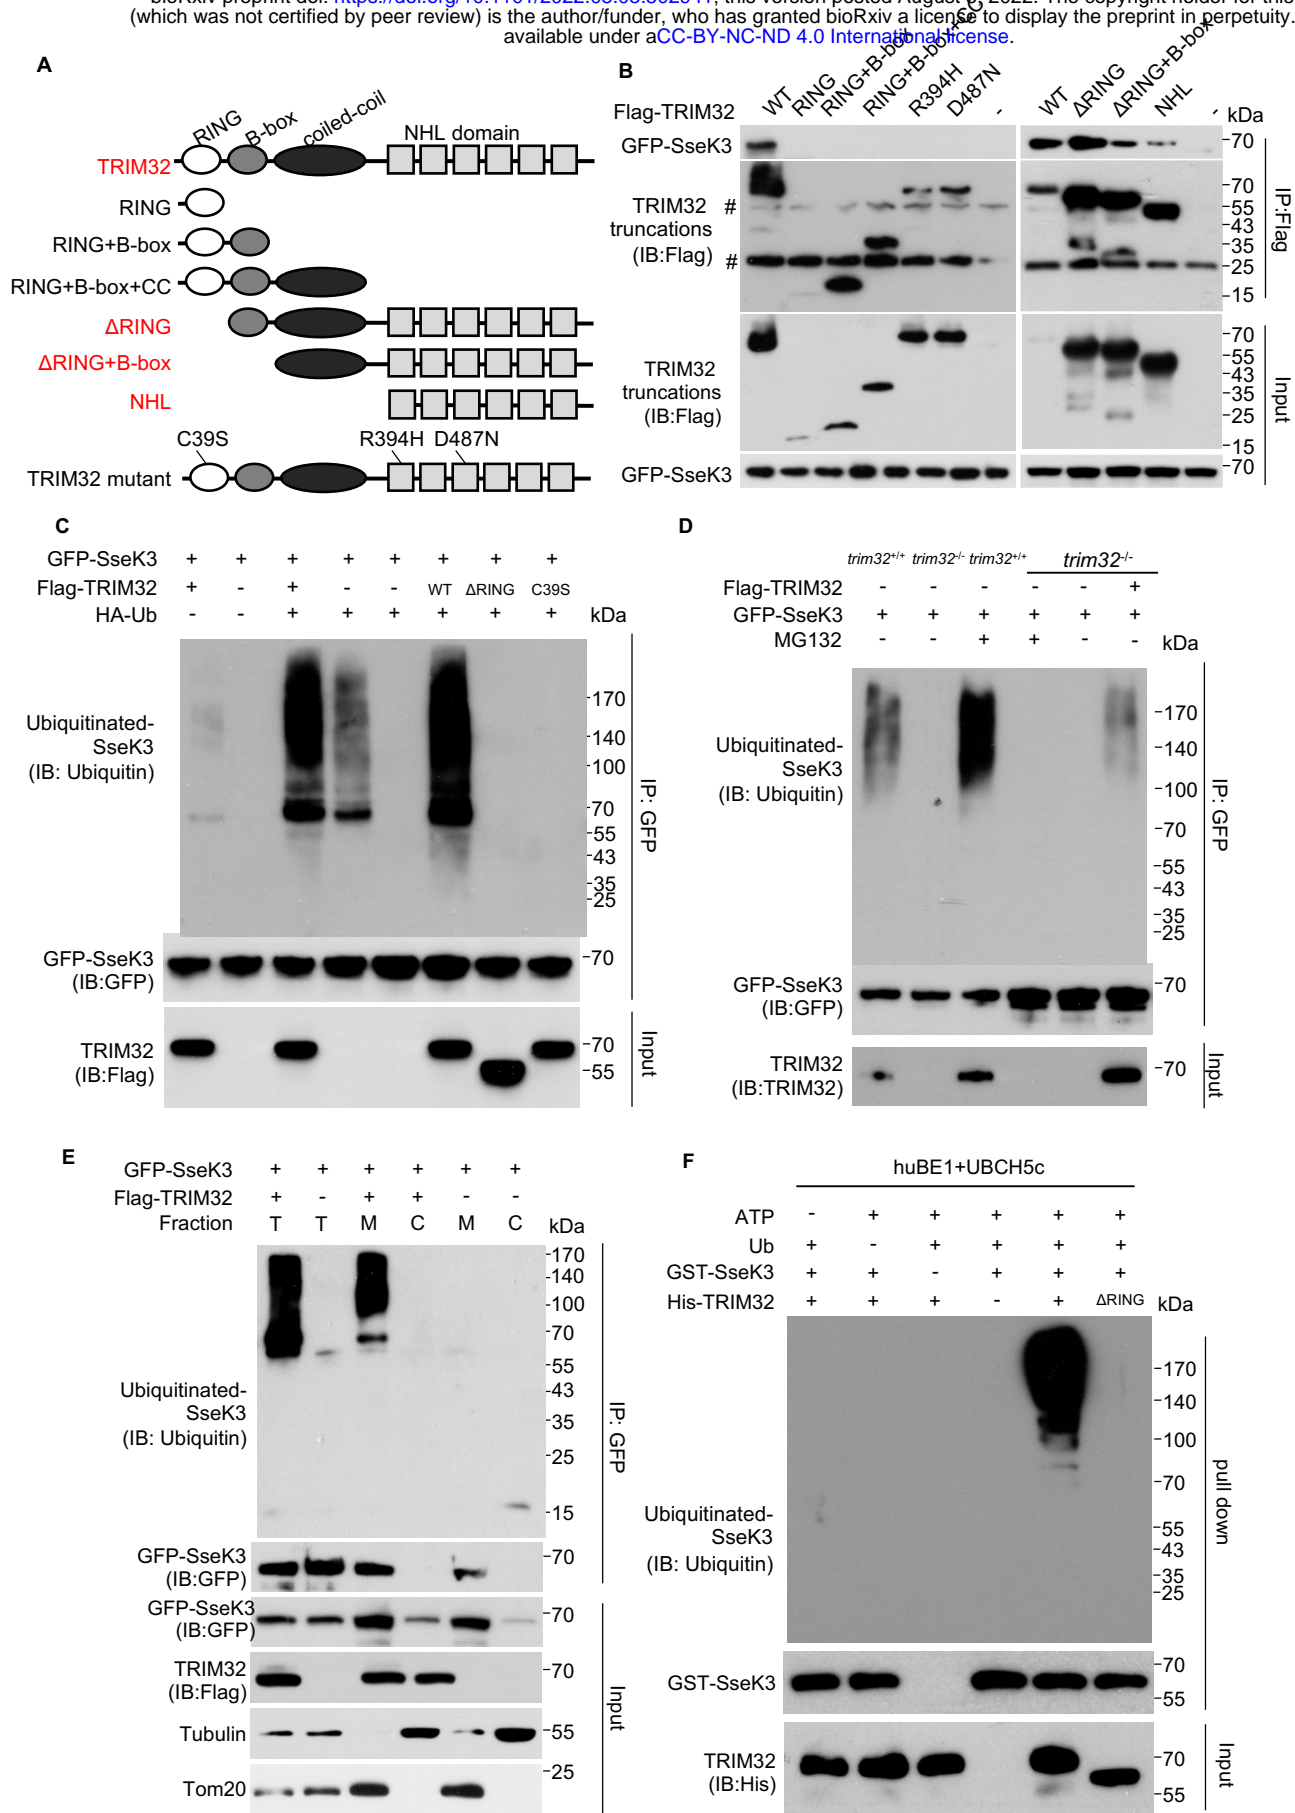

Figure 5

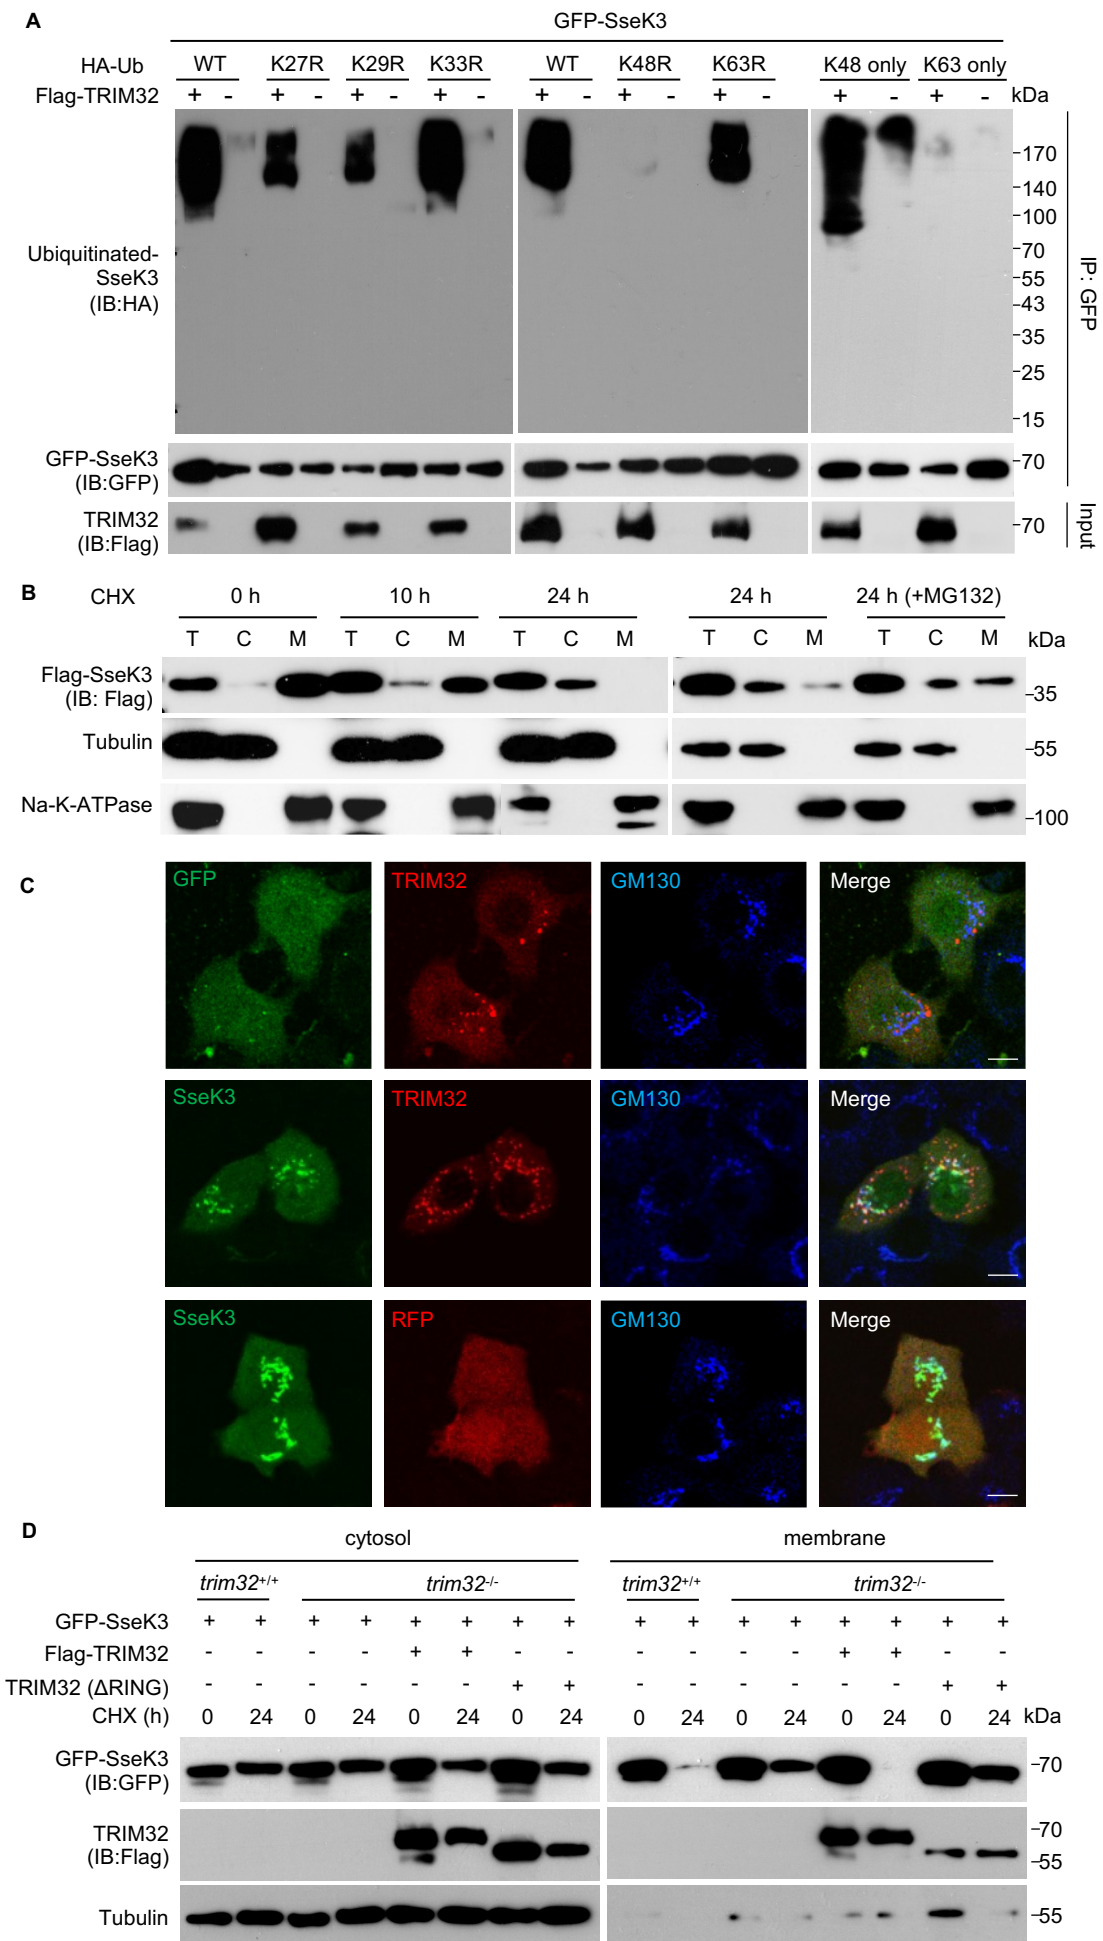

Figure 6

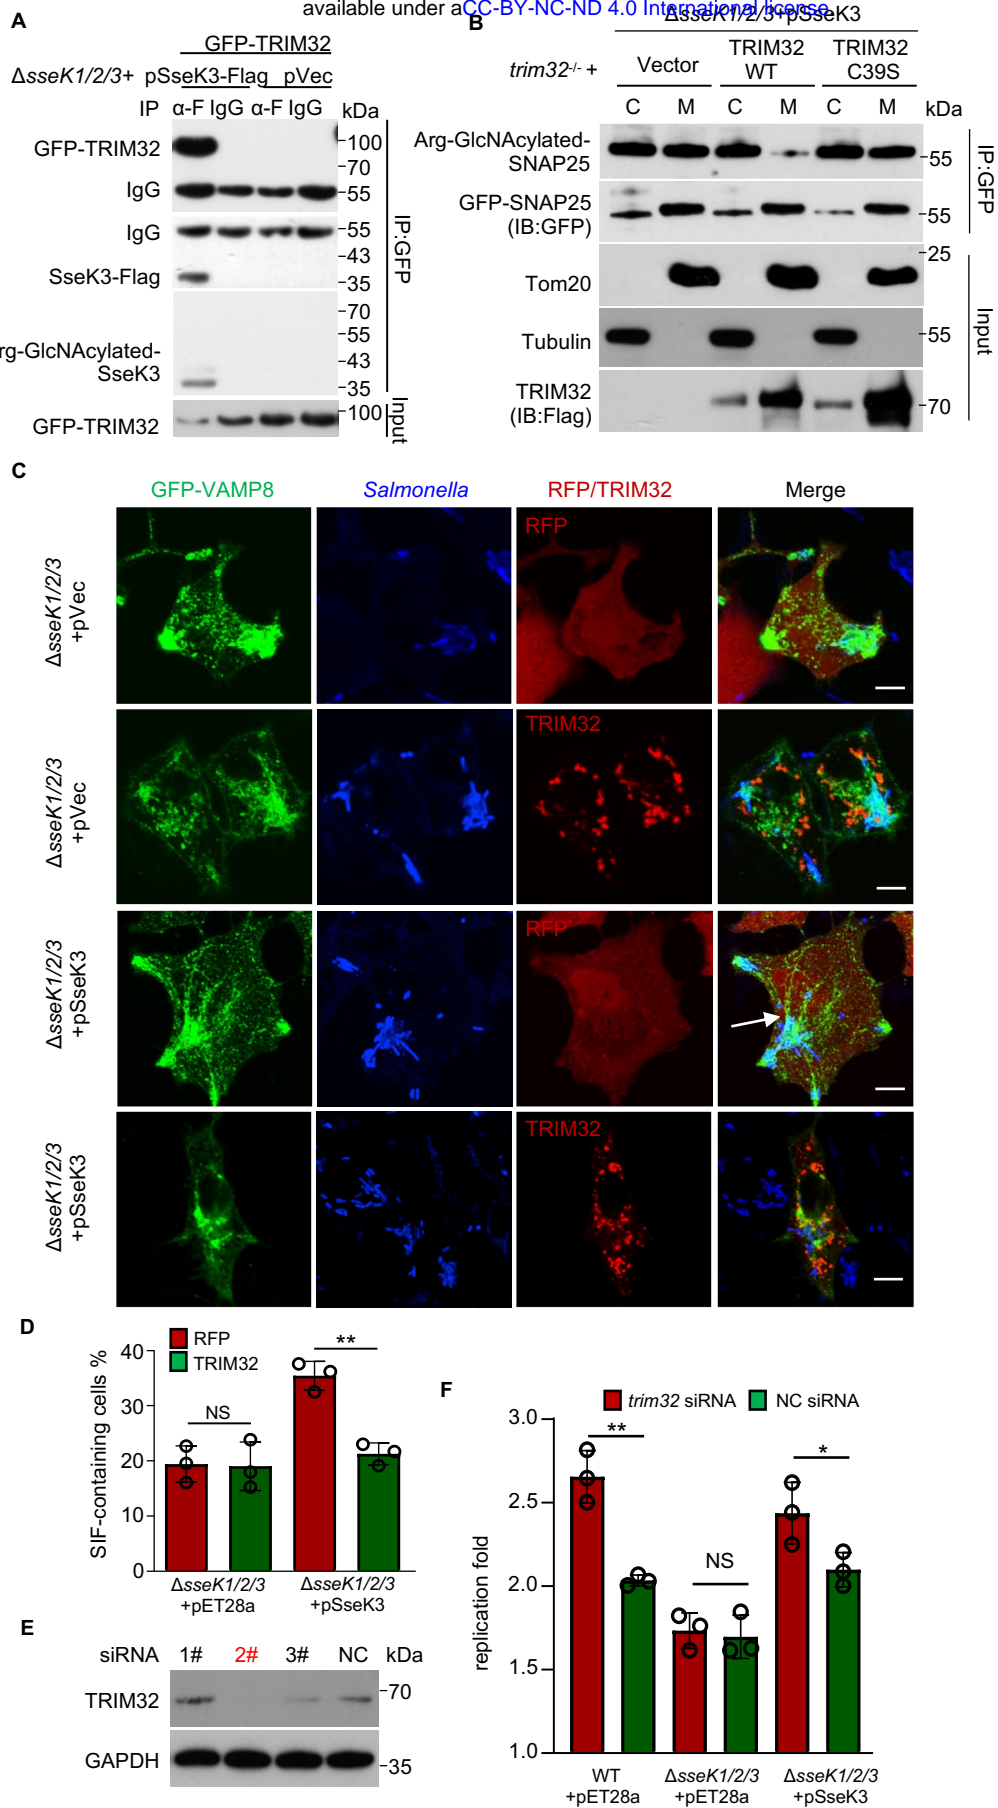

Figure 7

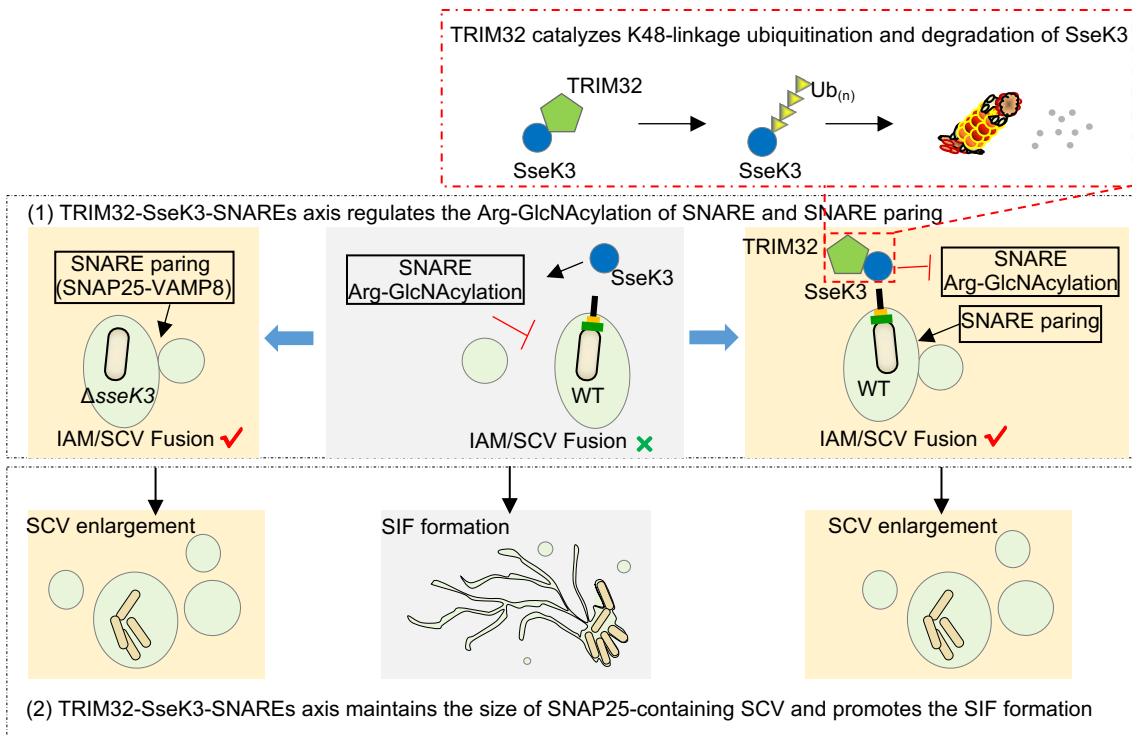

Figure 8

## **Supplementary Information for**

### **A host E3 ubiquitin ligase regulates Salmonella virulence by targeting an SPI-2 effector involved in SIF biogenesis**

Kun Meng<sup>1#</sup>, Jin Yang<sup>1#</sup>, Juan Xue<sup>1</sup>, Jun Lv<sup>1</sup>, Ping Zhu<sup>1</sup>, Liuli Shi<sup>4</sup>, Shan Li<sup>1,2,3\*</sup>

<sup>1</sup>Institute of Infection and Immunity, Taihe Hospital, Hubei University of Medicine, Shiyan, Hubei, China;

<sup>2</sup>College of Life Science and Technology, Huazhong Agricultural University, Wuhan, Hubei, China;

<sup>3</sup>College of Biomedicine and Health, Huazhong Agricultural University, Wuhan, Hubei, China;

<sup>4</sup>School of Basic Medical Science, Hubei University of Medicine, Shiyan, China.

\* Corresponding author: Shan Li

**Email:** lishan@mail.hzau.edu.cn

#### **This PDF file includes:**

Figures S1 to S3

Table S1 to S3

SI References

## Supplementary Tables

**Table S1. Bacterial strains used in this study**

| Strain or plasmid                            | Relevant characteristics                                                                    | References |
|----------------------------------------------|---------------------------------------------------------------------------------------------|------------|
| BL21(DE3)                                    | used for protein expression/purification                                                    | Novagen    |
| DH5 $\alpha$                                 | used for cloning                                                                            | Novagen    |
| SL1344                                       | wild type <i>S.Typhimurium</i> , Strep <sup>r</sup>                                         | ATCC       |
| SL1344 $\Delta$ <i>ssaV</i>                  | <i>ssaV</i> gene deleted in SL1344, Strep <sup>r</sup>                                      | [1]        |
| SL1344 $\Delta$ <i>sseK1/2/3</i>             | <i>sseK1</i> , <i>sseK2</i> and <i>sseK3</i> gene deleted in SL1344, Strep <sup>r</sup>     | [1]        |
| SL1344 $\Delta$ <i>sseK1/2/3</i> +pET28a     | $\Delta$ <i>sseK1/2/3</i> containing pET28a, Strep <sup>r</sup> , Km <sup>r</sup>           | [1]        |
| SL1344 $\Delta$ <i>sseK1/2/3</i> +pSseK1     | $\Delta$ <i>sseK1/2/3</i> containing pET28a-SseK1, Strep <sup>r</sup> , Km <sup>r</sup>     | [1]        |
| SL1344 $\Delta$ <i>sseK1/2/3</i> +pSseK2     | $\Delta$ <i>sseK1/2/3</i> containing pET28a-SseK2, Strep <sup>r</sup> , Km <sup>r</sup>     | [1]        |
| SL1344 $\Delta$ <i>sseK1/2/3</i> +pSseK3     | $\Delta$ <i>sseK1/2/3</i> containing pET28a-SseK3, Strep <sup>r</sup> , Km <sup>r</sup>     | [1]        |
| SL1344 $\Delta$ <i>sseK1/2/3</i> +pSseK3 DxD | $\Delta$ <i>sseK1/2/3</i> containing pET28a-SseK3 DxD, Strep <sup>r</sup> , Km <sup>r</sup> | [1]        |



**Table S2. Plasmids used in this study**

| Plasmids                       | Relevant characteristics                                                                | References     |
|--------------------------------|-----------------------------------------------------------------------------------------|----------------|
| pCS2-GFP-SseK3                 | pCS2-GFP carrying SseK3 coding region, Amp <sup>r</sup>                                 | [1]            |
| pCS2-GFP-SseK3 DxD             | pCS2-GFP carrying SseK3 D226A/D228A mutation, Amp <sup>r</sup>                          | [1]            |
| pCS2-RFP-SseK3                 | pCS2-RFP carrying SseK3 coding region, Amp <sup>r</sup>                                 | [1]            |
| pCS2-Flag-SNAP23               | pCS2-Flag carrying SNAP23 coding region, Amp <sup>r</sup>                               | This study     |
| pCS2-Flag-SNAP25               | pCS2-Flag carrying SNAP25 coding region, Amp <sup>r</sup>                               | This study     |
| pCS2-GFP-SNAP25                | pCS2-GFP carrying SNAP25 coding region, Amp <sup>r</sup>                                | This study     |
| pCS2-Flag-SNAP25 NTD           | pCS2-Flag carrying SNAP25 (1-90 aa) region, Amp <sup>r</sup>                            | This study     |
| pCS2-HA-SNAP23                 | pCS2-HA carrying SNAP23 coding region, Amp <sup>r</sup>                                 | This study     |
| pCS2-HA-SNAP25                 | pCS2-HA carrying SNAP25 coding region, Amp <sup>r</sup>                                 | This study     |
| pCS2-Flag-VAMP8                | pCS2-Flag carrying VAMP8 coding region, Amp <sup>r</sup>                                | This study     |
| pCS2-HA-VAMP8                  | pCS2-HA carrying VAMP8 coding region, Amp <sup>r</sup>                                  | This study     |
| pcDNA4-GFP-VAMP8               | pcDNA4 carrying GFP-VAMP8 coding region, Amp <sup>r</sup>                               | This study     |
| pCS2-Flag-Vti1b                | pCS2-Flag carrying Vti1b coding region, Amp <sup>r</sup>                                | This study     |
| pCS2-Flag-Sec22b               | pCS2-Flag carrying Sec22b coding region, Amp <sup>r</sup>                               | This study     |
| pCS2-Flag-Snapin               | pCS2-Flag carrying Snapin coding region, Amp <sup>r</sup>                               | This study     |
| pCS2-Flag-Syntaxin 7           | pCS2-Flag carrying Syntaxin7 coding region, Amp <sup>r</sup>                            | This study     |
| pCS2-Flag- Syntaxin 8          | pCS2-Flag carrying Syntaxin8 coding region, Amp <sup>r</sup>                            | This study     |
| pCS2-Flag- Rab1                | pCS2-Flag carrying Rab1 coding region, Amp <sup>r</sup>                                 | [1]            |
| pCS2-Flag-TRIM32 WT            | pCS2-Flag carrying TRIM32 (1-653aa) region, Amp <sup>r</sup>                            | This study     |
| pCS2-Flag-TRIM32 RING          | pCS2-Flag carrying TRIM32 (1-96 aa) region, Amp <sup>r</sup>                            | This study     |
| pCS2-Flag-TRIM32 RING+B-box    | pCS2-Flag carrying TRIM32 (1-135 aa) region, Amp <sup>r</sup>                           | This study     |
| pCS2-Flag-TRIM32 NHL           | pCS2-Flag carrying TRIM32 (255-653 aa) region, Amp <sup>r</sup>                         | This study     |
| pCS2-Flag-TRIM32 ΔRING         | pCS2-Flag carrying TRIM32 (97-653 aa) region, Amp <sup>r</sup>                          | This study     |
| pCS2-Flag-TRIM32 Δ(RING+B-box) | pCS2-Flag carrying TRIM32 (136-653 aa) region, Amp <sup>r</sup>                         | This study     |
| pCS2-Flag-TRIM32 ΔNHL          | pCS2-Flag carrying TRIM32 (1-254 aa) region, Amp <sup>r</sup>                           | This study     |
| pCS2-Flag-TRIM32 C39S          | pCS2-Flag carrying TRIM32 C39S mutation, Amp <sup>r</sup>                               | This study     |
| pCS2-Flag-TRIM32 R394H         | pCS2-Flag carrying TRIM32 R394H mutation, Amp <sup>r</sup>                              | This study     |
| pCS2-Flag-TRIM32 D487N         | pCS2-Flag carrying TRIM32 D487N mutation, Amp <sup>r</sup>                              | This study     |
| pHKO14-Cas9                    | SpCas9 expression plasmid, blasticidin resistance                                       | Gang Cao's lab |
| pHKO-GFP-sgRNA                 | sgRNA cloning backbone for expression of sgRNA in mammalian cells, puromycin resistance | Gang Cao's lab |
| pRK5-HA-Ub WT                  | pRK5-HA carrying wild type ubiquitin                                                    | Addgene        |
| pRK5-HA-Ub K27R                | pRK5-HA carrying ubiquitin K27R mutation                                                | This study     |
| pRK5-HA-Ub K29R                | pRK5-HA carrying ubiquitin K29R mutation                                                | This study     |
| pRK5-HA-Ub K33R                | pRK5-HA carrying ubiquitin K33R mutation                                                | This study     |
| pRK5-HA-Ub K48R                | pRK5-HA carrying ubiquitin K48R mutation                                                | This study     |
| pRK5-HA-Ub K63R                | pRK5-HA carrying ubiquitin K63R mutation                                                | This study     |
| pRK5-HA-Ub K48 only            | all Lys residues are mutated to Arg except K48                                          | [2]            |
| pRK5-HA-Ub K63R only           | all Lys residues are mutated to Arg except K63                                          | [2]            |

**Table S3. Antibodies and reagents used in this study**

| REAGENT or RESOURCE                                  | SOURCE                   | IDENTIFIER      |
|------------------------------------------------------|--------------------------|-----------------|
| <b>Antibodies</b>                                    |                          |                 |
| Mouse monoclonal anti-tubulinA                       | Sigma-Aldrich            | Cat#T5168       |
| Rabbit polyclonal anti-Arg-GlcNAc                    | Abcam                    | Cat#ab195033    |
| Mouse monoclonal anti-Flag                           | Sigma-Aldrich            | Cat#F7425       |
| Mouse monoclonal anti-EGFP                           | Santa Cruz Biotechnology | Cat#sc8334      |
| Mouse monoclonal anti-HA                             | Biolegend                | Cat#901501      |
| Rabbit polyclonal anti-Salmonella                    | Abcam                    | Cat#ab35156     |
| Mouse monoclonal anti-Ubiquitin P4D1                 | Santa Cruz Biotechnology | Cat#sc8017      |
| Mouse monoclonal anti-ATP1B1                         | Santa Cruz Biotechnology | Cat#sc21713     |
| Mouse monoclonal anti-Tom20                          | Santa Cruz Biotechnology | Cat#sc17764     |
| Mouse monoclonal anti-GM130                          | BD Biosciences           | Cat#5239872     |
| Goat Anti-Rabbit IgG H&L (Alexa Fluor® 488)          | Thermo Fisher Scientific | A32731          |
| Goat Anti-Mouse IgG H&L (Alexa Fluor® 488)           | Thermo Fisher Scientific | A32723          |
| Goat Anti-Rabbit IgG H&L (Alexa Fluor® 564)          | Thermo Fisher Scientific | A-11035         |
| Goat Anti-Mouse IgG H&L (Alexa Fluor® 564)           | Thermo Fisher Scientific | A-11030         |
| Goat Anti-Rabbit IgG H&L (Alexa Fluor® 647)          | Thermo Fisher Scientific | A32733          |
| Goat Anti-Mouse IgG H&L (Alexa Fluor® 647)           | Thermo Fisher Scientific | A32728          |
| <b>Chemicals, peptides, and recombinant proteins</b> |                          |                 |
| DAPI                                                 | Sigma-Aldrich            | Cat#D9542       |
| MG-132                                               | Sigma-Aldrich            | Cat#C2211       |
| Chloramphenicol                                      | Sigma-Aldrich            | Cat#R4408       |
| Isopropyl $\beta$ -D-Thiogalactoside (IPTG)          | Sigma-Aldrich            | Cat#I6758       |
| Cycloheximide                                        | Sigma-Aldrich            | Cat#C7698       |
| Ampicillin                                           | Sigma-Aldrich            | Cat#A9393       |
| Gentamicin                                           | Sigma-Aldrich            | Cat#G1397       |
| Kanamycin                                            | Sigma-Aldrich            | Cat#K1377       |
| Dulbecco's Modified Eagle's Medium, High Glucose     | Gibco                    | Cat#C11885500BT |
| PBS pH 7.4 basic (1 $\times$ )                       | Gibco                    | Cat#C10010500BT |
| Fetal Bovine Serum                                   | Biological Industries    | Cat#04-001-1ACS |
| 0.05% Trypsin-EDTA                                   | Thermo Fisher Scientific | Cat#25300054    |
| Complete Protease Inhibitor                          | Roche                    | Cat#11836170001 |
| DAPI                                                 | Thermo Fisher Scientific | Cat#D1306       |
| jetPRIME®                                            | Polyplus transfection    | Cat#114-15      |
| VigoFect                                             | Vigorous biotechnology   | Cat#T001        |
| Trypsin Protease, MS Grade                           | Thermo Fisher Scientific | Cat#90057       |
| Lys-C Endoproteinase, MS Grade                       | Thermo Fisher Scientific | Cat#90051       |
| Glu-C Endoproteinase                                 | Thermo Fisher Scientific | Cat#90054       |
| EZview™ Red® ANTI-FLAG M2 Affinity Gel               | Sigma-Aldrich            | Cat#F2426       |
| Anti-GFP Affinity Beads 4FF                          | SMART LIFESCIENCES       | Cat#SA070001    |

### **SI References**

1. Meng K, et al. (2020) Arginine GlcNAcylation of Rab small GTPases by the pathogen *Salmonella Typhimurium*. *Communications Biology* 3(1):287.
2. Yang Q, et al. (2017) TRIM32-TAX1BP1-dependent selective autophagic degradation of TRIF negatively regulates TLR3/4-mediated innate immune responses. *PLoS pathogens* 13(9):e1006600.

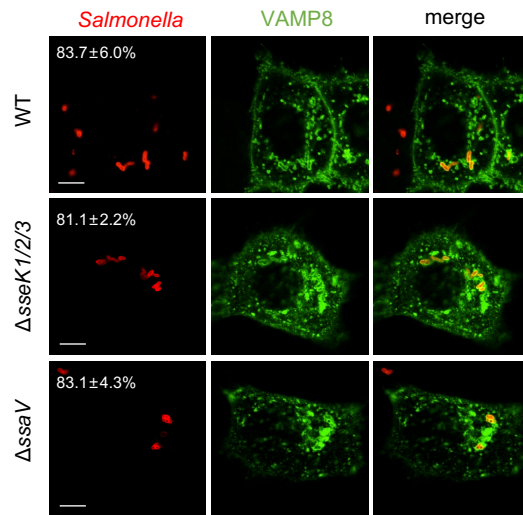

**Figure S1.** The Effects of SseKs on the frequency of VAMP-8 coated *Salmonella*. EGFP-VAMP8 stably expressed HeLa cells were infected with the indicated *Salmonella* strains for 2 hr. Shown are fluorescence detection of VAMP8 (green) and *Salmonella* (red). Statistics of cells showing the frequency of VAMP-8 coated *Salmonella* are listed in the upper left corner. At least 100 cells were counted for each experiment, and the statistical data shown are from three independent determinations. Scale bar, 10  $\mu$ m.

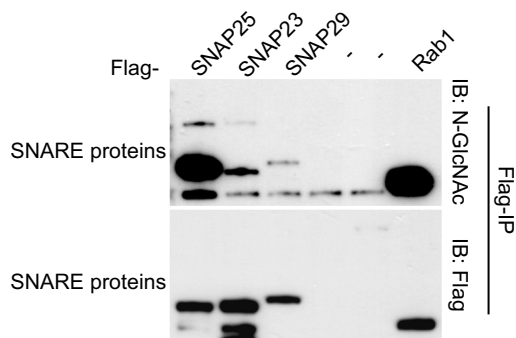

**Figure S2. Modification of SNAP proteins by SseK3 during *S. Typhimurium* infection.**

293T cells were transfected with a plasmid expressing the Flag-SNAP23, Flag-SNAP25, Flag-SNAP29 or Flag-Rab1 individually, and then infected with *S. Typhimurium*  $\Delta$ *sseK1/2/3* complemented with pET28a-SseK3. After infection, cells were lysed, and proteins were immunoprecipitated with anti-Flag beads, followed by standard immunoblotting analysis with the indicated antibodies.

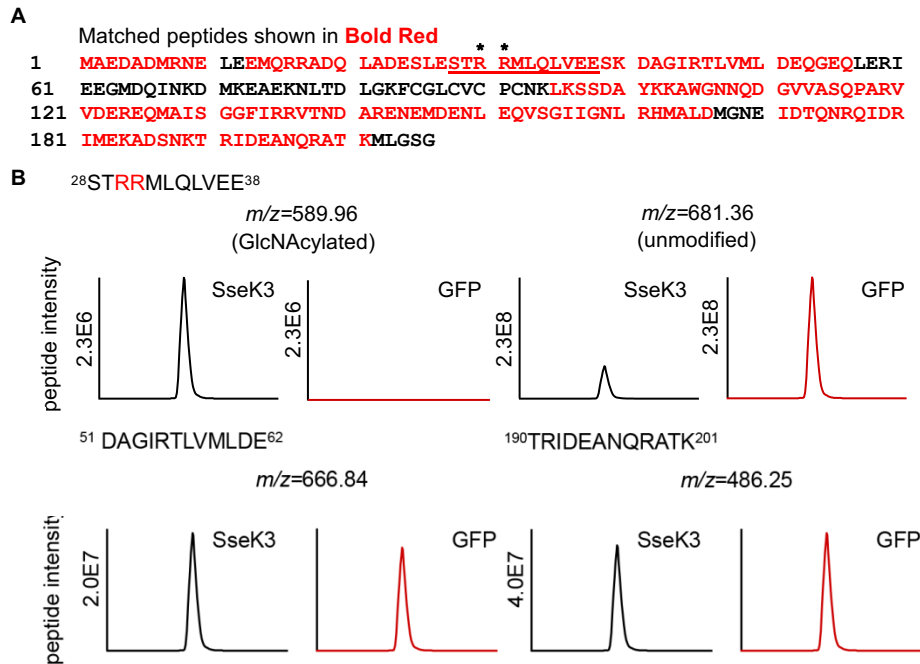

**Figure S3. MS detection of SNAP25 peptides intensity.** (A) Flag-SNAP25 was isolated from 293T cells co-transfected with either wild-type GFP-SseK3 or the empty plasmid GFP. Immunoprecipitated SNAP25 was then digested with GluC and LysC, and analyzed by LC-MS/MS. Detected SNAP25 sequence shown in red in LC-MS experiments. (B) The GlcNAcylated peptide sequence is underlined, and asterisks indicate the modification. The peptide  $^{28}\text{STRRMLQLVVEE}^{38}$  covalently modified with GlcNAc is shown, and the detected arginines are labeled in red. Two control peptides are also displayed. Extracted ion chromatograms of the doubly protonated peptide are shown with peak intensities indicating the relative amounts of either the modified or unmodified peptides. These data correspond to Fig 2.
